# Supplementary material for: Physical, social, and biological attributes for improved understanding and prediction of wildfires: FPA FOD-Attributes dataset
Source: Copernicus journal article supplement (doi:10.5194/essd-16-3045-2024), 2024-06-28
Supplement: Supplementary file 1 [file essd-16-3045-2024-supplement.pdf]

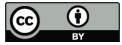

*Supplement of*

## **Physical, social, and biological attributes for improved understanding and prediction of wildfires: FPA FOD-Attributes dataset**

**Yavar Pourmohamad et al.**

*Correspondence to:* Mojtaba Sadegh ([mojtabasadegh@boisestate.edu](mailto:mojtabasadegh@boisestate.edu))

The copyright of individual parts of the supplement might differ from the article licence.

Table S1. Detailed description of attributes included in FPA FOD-Attributes and their sources.

| Category | Variable                   | Description                                                                                                                                                                                                                                                                                                                                                                                                                                                           | Additional Information and Source |
|----------|----------------------------|-----------------------------------------------------------------------------------------------------------------------------------------------------------------------------------------------------------------------------------------------------------------------------------------------------------------------------------------------------------------------------------------------------------------------------------------------------------------------|-----------------------------------|
| FPA FOD  | FOD_ID                     | Unique numeric record identifier                                                                                                                                                                                                                                                                                                                                                                                                                                      |                                   |
|          | FPA_ID                     | Unique identifier that contains information necessary to track back to the original record in the source dataset                                                                                                                                                                                                                                                                                                                                                      |                                   |
|          | SOURCE_SYSTEM_TYPE         | Type of source database or system that the record was drawn from (federal, nonfederal, or interagency)                                                                                                                                                                                                                                                                                                                                                                |                                   |
|          | SOURCE_SYSTEM              | Name of or other identifier for source database or system that the record was drawn from                                                                                                                                                                                                                                                                                                                                                                              |                                   |
|          | NWCG_REPORTING_AGENCY      | Active National Wildlife Coordinating Group (NWCG) Unit Identifier for the agency preparing the fire report (BIA = Bureau of Indian Affairs, BLM = Bureau of Land Management, BOR = Bureau of Reclamation, DOD = Department of Defense, DOE = Department of Energy, FS = Forest Service, FWS = Fish and Wildlife Service, IA = Interagency Organization, NPS = National Park Service, ST/C&L = State, County, or Local Organization, and TRIBE = Tribal Organization) |                                   |
|          | NWCG_REPORTING_UNIT_ID     | Active NWCG Unit Identifier for the unit preparing the fire report                                                                                                                                                                                                                                                                                                                                                                                                    |                                   |
|          | NWCG_REPORTING_UNIT_NAME   | Active NWCG Unit Name for the unit preparing the fire report                                                                                                                                                                                                                                                                                                                                                                                                          |                                   |
|          | SOURCE_REPORTING_UNIT      | Code for the agency unit preparing the fire report, based on code/name in the source dataset                                                                                                                                                                                                                                                                                                                                                                          |                                   |
|          | SOURCE_REPORTING_UNIT_NAME | Name of reporting agency unit preparing the fire report, based on code/name in the source dataset                                                                                                                                                                                                                                                                                                                                                                     |                                   |
|          | LOCAL_FIRE_REPORT_ID       | Number or code that uniquely identifies an incident report for a particular reporting unit and a particular calendar year                                                                                                                                                                                                                                                                                                                                             |                                   |

| <b>Category</b> | <b>Variable</b>               | <b>Description</b>                                                                                                                                                                                  | <b>Additional Information and Source</b> |
|-----------------|-------------------------------|-----------------------------------------------------------------------------------------------------------------------------------------------------------------------------------------------------|------------------------------------------|
|                 | LOCAL_INCIDENT_ID             | Number or code that uniquely identifies an incident for a particular local fire management organization within a particular calendar year                                                           |                                          |
|                 | FIRE_CODE                     | Code used within the interagency wildland fire community to track and compile cost information for emergency fire suppression ( <a href="https://www.firecode.gov/">https://www.firecode.gov/</a> ) |                                          |
|                 | FIRE_NAME                     | Name of the incident, from the fire report (primary) or ICS-209 report (secondary)                                                                                                                  |                                          |
|                 | ICS_209_PLUS_INCIDENT_JOIN_ID | Primary identifier needed to join into operational situation reporting data for the incident in the ICS-209-PLUS dataset                                                                            |                                          |
|                 | ICS_209_PLUS_COMPLEX_JOIN_ID  | If part of a complex, secondary identifier potentially needed to join to operational situation reporting data for the incident in the ICS-209-PLUS dataset (2014 and later only)                    |                                          |
|                 | MTBS_ID                       | Incident identifier, from the MTBS perimeter dataset                                                                                                                                                |                                          |
|                 | MTBS_FIRE_NAME                | Name of the incident, from the MTBS perimeter dataset                                                                                                                                               |                                          |
|                 | COMPLEX_NAME                  | Name of the complex under which the fire was ultimately managed, when discernible                                                                                                                   |                                          |
|                 | FIRE_YEAR                     | Calendar year in which the fire was discovered or confirmed to exist                                                                                                                                |                                          |
|                 | DISCOVERY_DATE                | Date on which the fire was discovered or confirmed to exist                                                                                                                                         |                                          |
|                 | DISCOVERY_DOY                 | Day of year on which the fire was discovered or confirmed to exist                                                                                                                                  |                                          |
|                 | DISCOVERY_TIME                | Time of day that the fire was discovered or confirmed to exist                                                                                                                                      |                                          |

| <b>Category</b> | <b>Variable</b>           | <b>Description</b>                                                                                                                                                                                                                                                                                                                                                                                           | <b>Additional Information and Source</b> |
|-----------------|---------------------------|--------------------------------------------------------------------------------------------------------------------------------------------------------------------------------------------------------------------------------------------------------------------------------------------------------------------------------------------------------------------------------------------------------------|------------------------------------------|
|                 | NWCG_CAUSE_CLASSIFICATION | Broad classification of the reason the fire occurred (Human, Natural, Missing data/not specified/undetermined)                                                                                                                                                                                                                                                                                               |                                          |
|                 | NWCG_GENERAL_CAUSE        | Event or circumstance that started a fire or set the stage for its occurrence (Arson/incendiarism, Debris and open burning, Equipment and vehicle use, Firearms and explosives use, Fireworks, Misuse of fire by a minor, Natural, Power generation/transmission/distribution, Railroad operations and maintenance, Recreation and ceremony, Smoking, Other causes, Missing data/not specified/undetermined) |                                          |
|                 | NWCG_CAUSE_AGE_CATEGORY   | If cause attributed to children (ages 0-12) or adolescents (13-17), the value for this data element is set to Minor; otherwise null                                                                                                                                                                                                                                                                          |                                          |
|                 | CONT_DATE                 | Date on which the fire was declared contained or otherwise controlled (mm/dd/yyyy where mm=month, dd=day, and yyyy=year)                                                                                                                                                                                                                                                                                     |                                          |
|                 | CONT_DOY                  | Day of year on which the fire was declared contained or otherwise controlled                                                                                                                                                                                                                                                                                                                                 |                                          |
|                 | CONT_TIME                 | Time of day that the fire was declared contained or otherwise controlled (hhmm where hh=hour, mm=minutes)                                                                                                                                                                                                                                                                                                    |                                          |
|                 | FIRE_SIZE                 | The estimate of acres within the final perimeter of the fire                                                                                                                                                                                                                                                                                                                                                 |                                          |
|                 | FIRE_SIZE_CLASS           | Code for fire size based on the number of acres within the final fire perimeter (A=greater than 0 but less than or equal to 0.25 acres, B=0.26-9.9 acres, C=10.0-99.9 acres, D=100-299 acres, E=300-999 acres, F=1000-4999, G=5000+ acres)                                                                                                                                                                   |                                          |
|                 | LATITUDE                  | Latitude (NAD83) for point location of the fire (decimal degrees)                                                                                                                                                                                                                                                                                                                                            |                                          |
|                 | LONGITUDE                 | Longitude (NAD83) for point location of the fire (decimal degrees)                                                                                                                                                                                                                                                                                                                                           |                                          |
|                 | OWNER_DESCRIPTOR          | Name of primary owner or entity responsible for managing the land at the point of origin of the fire at the time of the incident                                                                                                                                                                                                                                                                             |                                          |

| <b>Category</b>                                     | <b>Variable</b>                             | <b>Description</b>                                                                                                                                                                                | <b>Additional Information and Source</b> |
|-----------------------------------------------------|---------------------------------------------|---------------------------------------------------------------------------------------------------------------------------------------------------------------------------------------------------|------------------------------------------|
|                                                     | STATE                                       | Two-letter alphabetic code for the state in which the fire burned (or originated), based on the nominal designation in the fire report                                                            |                                          |
|                                                     | COUNTY                                      | County, or equivalent, in which the fire burned (or originated), based on nominal designation in the fire report                                                                                  |                                          |
|                                                     | FIPS_CODE                                   | Five-digit code from the Federal Information Process Standards (FIPS) publication 6-4 for representation of counties and equivalent entities, based on the nominal designation in the fire report |                                          |
|                                                     | FIPS_NAME                                   | County name from the FIPS publication 6-4 for representation of counties and equivalent entities, based on the nominal designation in the fire report                                             |                                          |
|                                                     | Year                                        | The year that fire discovers.                                                                                                                                                                     |                                          |
| Climate and Economic Justice Screening Tool (CEJST) | DF_PFS                                      | Diagnosed diabetes among adults aged greater than or equal to 18 years (percentile)                                                                                                               |                                          |
|                                                     | AF_PFS                                      | Current asthma among adults aged greater than or equal to 18 years (percentile)                                                                                                                   |                                          |
|                                                     | HDF_PFS                                     | Coronary heart disease among adults aged greater than or equal to 18 years (percentile)                                                                                                           |                                          |
|                                                     | DSF_PFS                                     | Diesel particulate matter exposure (percentile)                                                                                                                                                   |                                          |
|                                                     | EBF_PFS                                     | Energy burden (percentile)                                                                                                                                                                        |                                          |
|                                                     | EALR_PFS                                    | Expected agricultural loss rate (Natural Hazards Risk Index) (percentile)                                                                                                                         |                                          |
|                                                     | EBLR_PFS                                    | Expected building loss rate (Natural Hazards Risk Index) (percentile)                                                                                                                             |                                          |
|                                                     | EPLR_PFS                                    | Expected population loss rate (Natural Hazards Risk Index) (percentile)                                                                                                                           |                                          |
|                                                     | HBF_PFS                                     | Housing burden (percent) (percentile)                                                                                                                                                             |                                          |
|                                                     | LLEF_PFS                                    | Low life expectancy (percentile)                                                                                                                                                                  |                                          |
| LIF_PFS                                             | Linguistic isolation (percent) (percentile) |                                                                                                                                                                                                   |                                          |

| <b>Category</b> | <b>Variable</b> | <b>Description</b>                                                          | <b>Additional Information and Source</b>                                                   |
|-----------------|-----------------|-----------------------------------------------------------------------------|--------------------------------------------------------------------------------------------|
|                 | LMI_PFS         | Low median household income as a percent of area median income (percentile) |                                                                                            |
|                 | MHVF_PFS        | Median value (\$) of owner-occupied housing units (percentile)              |                                                                                            |
|                 | PM25F_PFS       | PM2.5 in the air (percentile)                                               |                                                                                            |
|                 | HSEF            | Percent individuals age 25 or over with less than high school degree        |                                                                                            |
|                 | P100_PFS        | Percent of individuals < 100% Federal Poverty Line (percentile)             |                                                                                            |
|                 | P200_PFS        | Percent of individuals below 200% Federal Poverty Line (percentile)         |                                                                                            |
|                 | LPF_PFS         | Percent pre-1960s housing (lead paint indicator) (percentile)               |                                                                                            |
|                 | NPL_PFS         | Proximity to NPL sites (percentile)                                         |                                                                                            |
|                 | RMP_PFS         | Proximity to Risk Management Plan (RMP) facilities (percentile)             |                                                                                            |
|                 | TSDF_PFS        | Proximity to hazardous waste sites (percentile)                             |                                                                                            |
|                 | TPF             | Total population                                                            |                                                                                            |
|                 | TF_PFS          | Traffic proximity and volume (percentile)                                   |                                                                                            |
|                 | UF_PFS          | Unemployment (percent) (percentile)                                         |                                                                                            |
|                 | WF_PFS          | Wastewater discharge (percentile)                                           |                                                                                            |
|                 | M_WTR           | Water Factor (Definition M*)                                                | Definition M: True / False variable for whether a tract is a Disadvantaged Community (DAC) |
|                 | M_WKFC          | Workforce Factor (Definition M)                                             |                                                                                            |
|                 | M_CLT           | Climate Factor (Definition M)                                               |                                                                                            |
|                 | M_ENY           | Energy Factor (Definition M)                                                |                                                                                            |

| <b>Category</b> | <b>Variable</b> | <b>Description</b>                                                                                                                                                            | <b>Additional Information and Source</b> |
|-----------------|-----------------|-------------------------------------------------------------------------------------------------------------------------------------------------------------------------------|------------------------------------------|
|                 | M_TRN           | Transportation Factor (Definition M)                                                                                                                                          |                                          |
|                 | M_HSG           | Housing Factor (Definition M)                                                                                                                                                 |                                          |
|                 | M_PLN           | Pollution Factor (Definition M)                                                                                                                                               |                                          |
|                 | M_HLTH          | Health Factor (Definition M)                                                                                                                                                  |                                          |
|                 | SM_C            | Definition M (communities)                                                                                                                                                    | Identified as disadvantaged              |
|                 | SM_PFS          | Definition M (percentile)                                                                                                                                                     |                                          |
|                 | EPLRLI          | Greater than or equal to the 90th percentile for expected population loss rate, is low income, and has a low percent of higher ed students?                                   |                                          |
|                 | EALRLI          | Greater than or equal to the 90th percentile for expected agriculture loss rate, is low income, and has a low percent of higher ed students?                                  |                                          |
|                 | EBLRLI          | Greater than or equal to the 90th percentile for expected building loss rate, is low income, and has a low percent of higher ed students?                                     |                                          |
|                 | PM25LI          | Greater than or equal to the 90th percentile for PM2.5 exposure, is low income, and has a low percent of higher ed students?                                                  |                                          |
|                 | EBLI            | Greater than or equal to the 90th percentile for energy burden, is low income, and has a low percent of higher ed students?                                                   |                                          |
|                 | DPMLI           | Greater than or equal to the 90th percentile for diesel particulate matter, is low income, and has a low percent of higher ed students?                                       |                                          |
|                 | TPLI            | Greater than or equal to the 90th percentile for traffic proximity, is low income, and has a low percent of higher ed students?                                               |                                          |
|                 | LPMHVLI         | Greater than or equal to the 90th percentile for lead paint, the median house value is less than 90th percentile, is low income, and has a low percent of higher ed students? |                                          |

| <b>Category</b> | <b>Variable</b> | <b>Description</b>                                                                                                                                                      | <b>Additional Information and Source</b> |
|-----------------|-----------------|-------------------------------------------------------------------------------------------------------------------------------------------------------------------------|------------------------------------------|
|                 | HBLI            | Greater than or equal to the 90th percentile for housing burden, is low income, and has a low percent of higher ed students?                                            |                                          |
|                 | RMPLI           | Greater than or equal to the 90th percentile for proximity to RMP sites, is low income, and has a low percent of higher ed students?                                    |                                          |
|                 | SFLI            | Greater than or equal to the 90th percentile for proximity to superfund sites, is low income, and has a low percent of higher ed students?                              |                                          |
|                 | HWLI            | Greater than or equal to the 90th percentile for proximity to hazardous waste facilities, is low income, and has a low percent of higher ed students?                   |                                          |
|                 | WDLI            | Greater than or equal to the 90th percentile for wastewater discharge, is low income, and has a low percent of higher ed students?                                      |                                          |
|                 | DLI             | Greater than or equal to the 90th percentile for diabetes, is low income, and has a low percent of higher ed students?                                                  |                                          |
|                 | ALI             | Greater than or equal to the 90th percentile for asthma, is low income, and has a low percent of higher ed students?                                                    |                                          |
|                 | HDLI            | Greater than or equal to the 90th percentile for heart disease, is low income, and has a low percent of higher ed students?                                             |                                          |
|                 | LLELI           | Greater than or equal to the 90th percentile for low life expectancy, is low income, and has a low percent of higher ed students?                                       |                                          |
|                 | LILHSE          | Greater than or equal to the 90th percentile for households in linguistic isolation, has low HS attainment, and has a low percent of higher ed students?                |                                          |
|                 | PLHSE           | Greater than or equal to the 90th percentile for households at or below 100% federal poverty level, has low HS attainment, and has a low percent of higher ed students? |                                          |



| <b>Category</b> | <b>Variable</b> | <b>Description</b>                                                                                                                                                                   | <b>Additional Information and Source</b> |
|-----------------|-----------------|--------------------------------------------------------------------------------------------------------------------------------------------------------------------------------------|------------------------------------------|
|                 | LMILHSE         | Greater than or equal to the 90th percentile for low median household income as a percent of area median income, has low HS attainment, and has a low percent of higher ed students? |                                          |
|                 | ULHSE           | Greater than or equal to the 90th percentile for unemployment, has low HS attainment, and has a low percent of higher ed students?                                                   |                                          |
|                 | EPL_ET          | Greater than or equal to the 90th percentile for expected population loss                                                                                                            |                                          |
|                 | EAL_ET          | Greater than or equal to the 90th percentile for expected agricultural loss                                                                                                          |                                          |
|                 | EBL_ET          | Greater than or equal to the 90th percentile for expected building loss                                                                                                              |                                          |
|                 | EB_ET           | Greater than or equal to the 90th percentile for energy burden                                                                                                                       |                                          |
|                 | PM25_ET         | Greater than or equal to the 90th percentile for pm2.5 exposure                                                                                                                      |                                          |
|                 | DS_ET           | Greater than or equal to the 90th percentile for diesel particulate matter                                                                                                           |                                          |
|                 | TP_ET           | Greater than or equal to the 90th percentile for traffic proximity                                                                                                                   |                                          |
|                 | LPP_ET          | Greater than or equal to the 90th percentile for lead paint and the median house value is less than 90th percentile                                                                  |                                          |
|                 | HB_ET           | Greater than or equal to the 90th percentile for housing burden                                                                                                                      |                                          |
|                 | RMP_ET          | Greater than or equal to the 90th percentile for RMP proximity                                                                                                                       |                                          |
|                 | NPL_ET          | Greater than or equal to the 90th percentile for NPL (superfund sites) proximity                                                                                                     |                                          |
|                 | TSDf_ET         | Greater than or equal to the 90th percentile for proximity to hazardous waste sites                                                                                                  |                                          |
|                 | WD_ET           | Greater than or equal to the 90th percentile for wastewater discharge                                                                                                                |                                          |
|                 | DB_ET           | Greater than or equal to the 90th percentile for diabetes                                                                                                                            |                                          |

| <b>Category</b> | <b>Variable</b> | <b>Description</b>                                                                                                                                               | <b>Additional Information and Source</b> |
|-----------------|-----------------|------------------------------------------------------------------------------------------------------------------------------------------------------------------|------------------------------------------|
|                 | A_ET            | Greater than or equal to the 90th percentile for asthma                                                                                                          |                                          |
|                 | HD_ET           | Greater than or equal to the 90th percentile for heart disease                                                                                                   |                                          |
|                 | LLE_ET          | Greater than or equal to the 90th percentile for low life expectancy                                                                                             |                                          |
|                 | UN_ET           | Greater than or equal to the 90th percentile for unemployment                                                                                                    |                                          |
|                 | LISO_ET         | Greater than or equal to the 90th percentile for households in linguistic isolation                                                                              |                                          |
|                 | POV_ET          | Greater than or equal to the 90th percentile for households at or below 100% federal poverty level                                                               |                                          |
|                 | LMI_ET          | Greater than or equal to the 90th percentile for low median household income as a percent of area median income                                                  |                                          |
|                 | IA_LMI_ET       | Low median household income as a percent of territory median income in 2009 exceeds 90th percentile                                                              |                                          |
|                 | IA_UN_ET        | Unemployment (percent) in 2009 exceeds 90th percentile                                                                                                           |                                          |
|                 | IA_POV_ET       | Percentage households below 100% of federal poverty line in 2009 exceeds 90th percentile                                                                         |                                          |
|                 | TC              | Total threshold criteria exceeded                                                                                                                                |                                          |
|                 | CC              | Total categories exceeded                                                                                                                                        |                                          |
|                 | IAULHSE         | Greater than or equal to the 90th percentile for unemployment and has low HS education in 2009 (island areas)?                                                   |                                          |
|                 | IAPLHSE         | Greater than or equal to the 90th percentile for households at or below 100% federal poverty level and has low HS education in 2009 (island areas)?              |                                          |
|                 | IALMILHSE       | Greater than or equal to the 90th percentile for low median household income as a percent of area median income and has low HS education in 2009 (island areas)? |                                          |

| <b>Category</b> | <b>Variable</b> | <b>Description</b>                                                                             | <b>Additional Information and Source</b>                         |
|-----------------|-----------------|------------------------------------------------------------------------------------------------|------------------------------------------------------------------|
|                 | IALMIL_87       | Low median household income as a percent of territory median income in 2009 (percentile)       |                                                                  |
|                 | IAPLHS_88       | Percentage households below 100% of federal poverty line in 2009 for island areas (percentile) |                                                                  |
|                 | IAULHS_89       | Unemployment (percent) in 2009 for island areas (percentile)                                   |                                                                  |
|                 | LHE             | Low high school education and low percent of higher ed students                                |                                                                  |
|                 | IALHE           | Low high school education in 2009 (island areas)                                               |                                                                  |
|                 | IAHSEF          | Percent individuals age 25 or over with less than high school degree in 2009                   |                                                                  |
|                 | CA              | Percent enrollment in college or graduate school                                               |                                                                  |
|                 | NCA             | Percent of population not currently enrolled in college or graduate school                     | Percent of residents who are not currently enrolled in higher ed |
|                 | CA_LT20         | Percent higher ed enrollment rate is less than 20%                                             |                                                                  |
|                 | M_CLT_EOMI      | At least one climate threshold exceeded                                                        |                                                                  |
|                 | M_ENY_EOMI      | At least one energy threshold exceeded                                                         |                                                                  |
|                 | M_TRN_EOMI      | At least one traffic threshold exceeded                                                        |                                                                  |
|                 | M_HSG_EOMI      | At least one housing threshold exceeded                                                        |                                                                  |
|                 | M_PLN_EOMI      | At least one pollution threshold exceeded                                                      |                                                                  |
|                 | M_WTR_EOMI      | At least one water threshold exceeded                                                          |                                                                  |
|                 | M_HLTH_102      | At least one health threshold exceeded                                                         |                                                                  |
|                 | M_WKFC_103      | At least one workforce threshold exceeded                                                      |                                                                  |
|                 | FPL200S         | Is low income?                                                                                 |                                                                  |

| Category        | Variable             | Description                                                    | Additional Information and Source                                                                                                                                                                 |
|-----------------|----------------------|----------------------------------------------------------------|---------------------------------------------------------------------------------------------------------------------------------------------------------------------------------------------------|
|                 | M_WKFC_105           | Both workforce socioeconomic indicators exceeded               |                                                                                                                                                                                                   |
|                 | M_EBSI               | Is low income and has a low percent of higher ed students?     |                                                                                                                                                                                                   |
|                 | UI_EXP               | UI_EXP                                                         |                                                                                                                                                                                                   |
|                 | THRHL D              | THRHL D                                                        |                                                                                                                                                                                                   |
| Annual Climate  | Annual_etr           | Annual total reference evapotranspiration (mm)                 | <a href="http://thredds.northwestknowledge.net:8080/thredds/catalog/MET/climatologies/catalog.html">http://thredds.northwestknowledge.net:8080/thredds/catalog/MET/climatologies/catalog.html</a> |
|                 | Annual_precipitation | Annual total precipitation (mm)                                | <a href="http://thredds.northwestknowledge.net:8080/thredds/catalog/MET/climatologies/catalog.html">http://thredds.northwestknowledge.net:8080/thredds/catalog/MET/climatologies/catalog.html</a> |
|                 | Annual_temperature   | Annual average temperature (k)                                 | <a href="http://thredds.northwestknowledge.net:8080/thredds/catalog/MET/climatologies/catalog.html">http://thredds.northwestknowledge.net:8080/thredds/catalog/MET/climatologies/catalog.html</a> |
|                 | Aridity_index        | Ratio of precipitation to reference evapotranspiration (P/PET) | <a href="http://thredds.northwestknowledge.net:8080/thredds/catalog/MET/climatologies/catalog.html">http://thredds.northwestknowledge.net:8080/thredds/catalog/MET/climatologies/catalog.html</a> |
| CheatGrass      | CheatGrass           | Cheatgrass percent cover                                       | <a href="https://www.sciencebase.gov/catalog/item/61716970d34ea36449a77130">https://www.sciencebase.gov/catalog/item/61716970d34ea36449a77130</a>                                                 |
|                 | ExoticAnnualGrass    | Non-native annual grass percent cover                          | <a href="https://www.sciencebase.gov/catalog/item/61716970d34ea36449a77130">https://www.sciencebase.gov/catalog/item/61716970d34ea36449a77130</a>                                                 |
|                 | Medusahead           | Medusahead percent cover                                       | <a href="https://www.sciencebase.gov/catalog/item/61716970d34ea36449a77130">https://www.sciencebase.gov/catalog/item/61716970d34ea36449a77130</a>                                                 |
|                 | PoaSecunda           | Poa secunda percent cover                                      | <a href="https://www.sciencebase.gov/catalog/item/61716970d34ea36449a77130">https://www.sciencebase.gov/catalog/item/61716970d34ea36449a77130</a>                                                 |
| Climate Normals | pr_Normal            | Long term average precipitation                                | <a href="http://thredds.northwestknowledge.net:8080/thredds/catalog/MET/climatologies/catalog.html">http://thredds.northwestknowledge.net:8080/thredds/catalog/MET/climatologies/catalog.html</a> |
|                 | tmmn_Normal          | Long term average minimum temperature                          | <a href="http://thredds.northwestknowledge.net:8080/thredds/catalog/MET/climatologies/catalog.html">http://thredds.northwestknowledge.net:8080/thredds/catalog/MET/climatologies/catalog.html</a> |
|                 | tmmx_Normal          | Long term average maximum temperature                          | <a href="http://thredds.northwestknowledge.net:8080/thredds/catalog/MET/climatologies/catalog.html">http://thredds.northwestknowledge.net:8080/thredds/catalog/MET/climatologies/catalog.html</a> |

| <b>Category</b> | <b>Variable</b> | <b>Description</b>                                     | <b>Additional Information and Source</b>                                                                                                                                                          |
|-----------------|-----------------|--------------------------------------------------------|---------------------------------------------------------------------------------------------------------------------------------------------------------------------------------------------------|
|                 | rmin_Normal     | Long term average minimum relative humidity            | <a href="http://thredds.northwestknowledge.net:8080/thredds/catalog/MET/climatologies/catalog.html">http://thredds.northwestknowledge.net:8080/thredds/catalog/MET/climatologies/catalog.html</a> |
|                 | rmax_Normal     | Long term average maximum relative humidity            | <a href="http://thredds.northwestknowledge.net:8080/thredds/catalog/MET/climatologies/catalog.html">http://thredds.northwestknowledge.net:8080/thredds/catalog/MET/climatologies/catalog.html</a> |
|                 | sph_Normal      | Long term average specific humidity                    | <a href="http://thredds.northwestknowledge.net:8080/thredds/catalog/MET/climatologies/catalog.html">http://thredds.northwestknowledge.net:8080/thredds/catalog/MET/climatologies/catalog.html</a> |
|                 | srad_Normal     | Long term average surface downward shortwave radiation | <a href="http://thredds.northwestknowledge.net:8080/thredds/catalog/MET/climatologies/catalog.html">http://thredds.northwestknowledge.net:8080/thredds/catalog/MET/climatologies/catalog.html</a> |
|                 | fm100_Normal    | Long term average 100-hour dead fuel moisture          | <a href="http://thredds.northwestknowledge.net:8080/thredds/catalog/MET/climatologies/catalog.html">http://thredds.northwestknowledge.net:8080/thredds/catalog/MET/climatologies/catalog.html</a> |
|                 | fm1000_Normal   | Long term average 1000-hour dead fuel moisture         | <a href="http://thredds.northwestknowledge.net:8080/thredds/catalog/MET/climatologies/catalog.html">http://thredds.northwestknowledge.net:8080/thredds/catalog/MET/climatologies/catalog.html</a> |
|                 | bi_Normal       | Long term average burning index                        | <a href="http://thredds.northwestknowledge.net:8080/thredds/catalog/MET/climatologies/catalog.html">http://thredds.northwestknowledge.net:8080/thredds/catalog/MET/climatologies/catalog.html</a> |
|                 | vpd_Normal      | Long term average mean vapor pressure deficit          | <a href="http://thredds.northwestknowledge.net:8080/thredds/catalog/MET/climatologies/catalog.html">http://thredds.northwestknowledge.net:8080/thredds/catalog/MET/climatologies/catalog.html</a> |
|                 | erc_Normal      | Percentile of energy release component                 | <a href="http://thredds.northwestknowledge.net:8080/thredds/catalog/MET/climatologies/catalog.html">http://thredds.northwestknowledge.net:8080/thredds/catalog/MET/climatologies/catalog.html</a> |
| GRIDMET         | pr              | Precipitation amount (mm)                              | <a href="https://www.climatologylab.org/gridmet.html">https://www.climatologylab.org/gridmet.html</a>                                                                                             |
|                 | tmmn            | Minimum temperature (K)                                | <a href="https://www.climatologylab.org/gridmet.html">https://www.climatologylab.org/gridmet.html</a>                                                                                             |
|                 | tmmx            | Maximum temperature (K)                                | <a href="https://www.climatologylab.org/gridmet.html">https://www.climatologylab.org/gridmet.html</a>                                                                                             |
|                 | rmin            | Minimum relative humidity (%)                          | <a href="https://www.climatologylab.org/gridmet.html">https://www.climatologylab.org/gridmet.html</a>                                                                                             |
|                 | rmax            | Maximum relative humidity (%)                          | <a href="https://www.climatologylab.org/gridmet.html">https://www.climatologylab.org/gridmet.html</a>                                                                                             |
|                 | sph             | Specific humidity (kg/kg)                              | <a href="https://www.climatologylab.org/gridmet.html">https://www.climatologylab.org/gridmet.html</a>                                                                                             |

| <b>Category</b> | <b>Variable</b> | <b>Description</b>                                                                      | <b>Additional Information and Source</b>                                                              |
|-----------------|-----------------|-----------------------------------------------------------------------------------------|-------------------------------------------------------------------------------------------------------|
|                 | vs              | Wind velocity at 10 m above ground (m/s)                                                | <a href="https://www.climatologylab.org/gridmet.html">https://www.climatologylab.org/gridmet.html</a> |
|                 | th              | Wind direction (degrees clockwise from north)                                           | <a href="https://www.climatologylab.org/gridmet.html">https://www.climatologylab.org/gridmet.html</a> |
|                 | srad            | Surface downward shortwave radiation (W/m <sup>2</sup> )                                | <a href="https://www.climatologylab.org/gridmet.html">https://www.climatologylab.org/gridmet.html</a> |
|                 | etr             | Daily reference evapotranspiration (alfalfa, mm)                                        | <a href="https://www.climatologylab.org/gridmet.html">https://www.climatologylab.org/gridmet.html</a> |
|                 | fm100           | 100-hour dead fuel moisture (%)                                                         | <a href="https://www.climatologylab.org/gridmet.html">https://www.climatologylab.org/gridmet.html</a> |
|                 | fm1000          | 1000-hour dead fuel moisture (%)                                                        | <a href="https://www.climatologylab.org/gridmet.html">https://www.climatologylab.org/gridmet.html</a> |
|                 | bi              | Burning index (NFDRS fire danger index)                                                 | <a href="https://www.climatologylab.org/gridmet.html">https://www.climatologylab.org/gridmet.html</a> |
|                 | vpd             | Mean vapor pressure deficit (kPa)                                                       | <a href="https://www.climatologylab.org/gridmet.html">https://www.climatologylab.org/gridmet.html</a> |
|                 | erc             | Energy release component (NFDRS fire danger index)                                      | <a href="https://www.climatologylab.org/gridmet.html">https://www.climatologylab.org/gridmet.html</a> |
|                 | pr_5D_mean      | Precipitation average in a 5-day window centered on the fire discovery date             | <a href="https://www.climatologylab.org/gridmet.html">https://www.climatologylab.org/gridmet.html</a> |
|                 | tmmn_5D_mean    | Minimum temperature average in a 5-day window centered on the fire discovery date       | <a href="https://www.climatologylab.org/gridmet.html">https://www.climatologylab.org/gridmet.html</a> |
|                 | tmmx_5D_mean    | Maximum temperature average in a 5-day window centered on the fire discovery date       | <a href="https://www.climatologylab.org/gridmet.html">https://www.climatologylab.org/gridmet.html</a> |
|                 | rmin_5D_mean    | Minimum relative humidity average in a 5-day window centered on the fire discovery date | <a href="https://www.climatologylab.org/gridmet.html">https://www.climatologylab.org/gridmet.html</a> |
|                 | rmax_5D_mean    | Maximum relative humidity average in a 5-day window centered on the fire discovery date | <a href="https://www.climatologylab.org/gridmet.html">https://www.climatologylab.org/gridmet.html</a> |
|                 | sph_5D_mean     | Specific humidity average in a 5-day window centered on the fire discovery date         | <a href="https://www.climatologylab.org/gridmet.html">https://www.climatologylab.org/gridmet.html</a> |
|                 | vs_5D_mean      | Wind velocity average in a 5-day window centered on the fire discovery date             | <a href="https://www.climatologylab.org/gridmet.html">https://www.climatologylab.org/gridmet.html</a> |
|                 | th_5D_mean      | Wind direction average in a 5-day window centered on the fire discovery date            | <a href="https://www.climatologylab.org/gridmet.html">https://www.climatologylab.org/gridmet.html</a> |

| <b>Category</b> | <b>Variable</b> | <b>Description</b>                                                                                 | <b>Additional Information and Source</b>                                                              |
|-----------------|-----------------|----------------------------------------------------------------------------------------------------|-------------------------------------------------------------------------------------------------------|
|                 | srad_5D_mean    | Surface downward shortwave radiation average in a 5-day window centered on the fire discovery date | <a href="https://www.climatologylab.org/gridmet.html">https://www.climatologylab.org/gridmet.html</a> |
|                 | etr_5D_mean     | Daily reference evapotranspiration average in a 5-day window centered on the fire discovery date   | <a href="https://www.climatologylab.org/gridmet.html">https://www.climatologylab.org/gridmet.html</a> |
|                 | fm100_5D_mean   | 100-hour dead fuel moisture average in a 5-day window centered on the fire discovery date          | <a href="https://www.climatologylab.org/gridmet.html">https://www.climatologylab.org/gridmet.html</a> |
|                 | fm1000_5D_mean  | 1000-hour dead fuel moisture average in a 5-day window centered on the fire discovery date         | <a href="https://www.climatologylab.org/gridmet.html">https://www.climatologylab.org/gridmet.html</a> |
|                 | bi_5D_mean      | Burning index average in a 5-day window centered on the fire discovery date                        | <a href="https://www.climatologylab.org/gridmet.html">https://www.climatologylab.org/gridmet.html</a> |
|                 | vpd_5D_mean     | Vapor pressure deficit average in a 5-day window centered on the fire discovery date               | <a href="https://www.climatologylab.org/gridmet.html">https://www.climatologylab.org/gridmet.html</a> |
|                 | erc_5D_mean     | Energy release component average in a 5-day window centered on the fire discovery date             | <a href="https://www.climatologylab.org/gridmet.html">https://www.climatologylab.org/gridmet.html</a> |
|                 | pr_5D_min       | Minimum precipitation in a 5-day window centered on the fire discovery date                        | <a href="https://www.climatologylab.org/gridmet.html">https://www.climatologylab.org/gridmet.html</a> |
|                 | pr_5D_max       | Maximum precipitation in a 5-day window centered on the fire discovery date                        | <a href="https://www.climatologylab.org/gridmet.html">https://www.climatologylab.org/gridmet.html</a> |
|                 | tmmn_5D_max     | Maximum minimum temperature in a 5-day window centered on the fire discovery date                  | <a href="https://www.climatologylab.org/gridmet.html">https://www.climatologylab.org/gridmet.html</a> |
|                 | tmmx_5D_max     | Maximum maximum temperature in a 5-day window centered on the fire discovery date                  | <a href="https://www.climatologylab.org/gridmet.html">https://www.climatologylab.org/gridmet.html</a> |
|                 | rmin_5D_min     | Minimum minimum relative humidity in a 5-day window centered on the fire discovery date            | <a href="https://www.climatologylab.org/gridmet.html">https://www.climatologylab.org/gridmet.html</a> |
|                 | rmax_5D_min     | Minimum maximum relative humidity in a 5-day window centered on the fire discovery date            | <a href="https://www.climatologylab.org/gridmet.html">https://www.climatologylab.org/gridmet.html</a> |

| <b>Category</b>     | <b>Variable</b> | <b>Description</b>                                                                                 | <b>Additional Information and Source</b>                                                                                                                                                          |
|---------------------|-----------------|----------------------------------------------------------------------------------------------------|---------------------------------------------------------------------------------------------------------------------------------------------------------------------------------------------------|
|                     | sph_5D_min      | Minimum specific humidity in a 5-day window centered on the fire discovery date                    | <a href="https://www.climatologylab.org/gridmet.html">https://www.climatologylab.org/gridmet.html</a>                                                                                             |
|                     | vs_5D_max       | Maximum wind velocity in a 5-day window centered on the fire discovery date                        | <a href="https://www.climatologylab.org/gridmet.html">https://www.climatologylab.org/gridmet.html</a>                                                                                             |
|                     | th_5D_max       | Maximum wind direction in a 5-day window centered on the fire discovery date                       | <a href="https://www.climatologylab.org/gridmet.html">https://www.climatologylab.org/gridmet.html</a>                                                                                             |
|                     | srad_5D_max     | Maximum surface downward shortwave radiation in a 5-day window centered on the fire discovery date | <a href="https://www.climatologylab.org/gridmet.html">https://www.climatologylab.org/gridmet.html</a>                                                                                             |
|                     | etr_5D_max      | Maximum daily reference evapotranspiration in a 5-day window centered on the fire discovery date   | <a href="https://www.climatologylab.org/gridmet.html">https://www.climatologylab.org/gridmet.html</a>                                                                                             |
|                     | fm100_5D_min    | Minimum 100-hour dead fuel moisture in a 5-day window centered on the fire discovery date          | <a href="https://www.climatologylab.org/gridmet.html">https://www.climatologylab.org/gridmet.html</a>                                                                                             |
|                     | fm1000_5D_min   | Minimum 1000-hour dead fuel moisture in a 5-day window centered on the fire discovery date         | <a href="https://www.climatologylab.org/gridmet.html">https://www.climatologylab.org/gridmet.html</a>                                                                                             |
|                     | bi_5D_max       | Maximum burning index in a 5-day window centered on the fire discovery date                        | <a href="https://www.climatologylab.org/gridmet.html">https://www.climatologylab.org/gridmet.html</a>                                                                                             |
|                     | vpd_5D_max      | Maximum vapor pressure deficit in a 5-day window centered on the fire discovery date               | <a href="https://www.climatologylab.org/gridmet.html">https://www.climatologylab.org/gridmet.html</a>                                                                                             |
|                     | erc_5D_max      | Maximum venergy release component in a 5-day window centered on the fire discovery date            | <a href="https://www.climatologylab.org/gridmet.html">https://www.climatologylab.org/gridmet.html</a>                                                                                             |
| Climate Percentiles | tmmn_Percentile | Percentile range of minimum temperature                                                            | <a href="http://thredds.northwestknowledge.net:8080/thredds/catalog/MET/climatologies/catalog.html">http://thredds.northwestknowledge.net:8080/thredds/catalog/MET/climatologies/catalog.html</a> |
|                     | tmmx_Percentile | Percentile range of maximum temperature                                                            | <a href="http://thredds.northwestknowledge.net:8080/thredds/catalog/MET/climatologies/catalog.html">http://thredds.northwestknowledge.net:8080/thredds/catalog/MET/climatologies/catalog.html</a> |
|                     | sph_Percentile  | Percentile range of specific humidity                                                              | <a href="http://thredds.northwestknowledge.net:8080/thredds/catalog/MET/climatologies/catalog.html">http://thredds.northwestknowledge.net:8080/thredds/catalog/MET/climatologies/catalog.html</a> |



| <b>Category</b>       | <b>Variable</b>     | <b>Description</b>                                              | <b>Additional Information and Source</b>                                                                                                                                                          |
|-----------------------|---------------------|-----------------------------------------------------------------|---------------------------------------------------------------------------------------------------------------------------------------------------------------------------------------------------|
|                       | vs_Percentile       | Percentile range of wind velocity                               | <a href="http://thredds.northwestknowledge.net:8080/thredds/catalog/MET/climatologies/catalog.html">http://thredds.northwestknowledge.net:8080/thredds/catalog/MET/climatologies/catalog.html</a> |
|                       | fm100_Percentile    | Percentile range of 100-hour dead fuel moisture                 | <a href="http://thredds.northwestknowledge.net:8080/thredds/catalog/MET/climatologies/catalog.html">http://thredds.northwestknowledge.net:8080/thredds/catalog/MET/climatologies/catalog.html</a> |
|                       | bi_Percentile       | Percentile range of burning index                               | <a href="http://thredds.northwestknowledge.net:8080/thredds/catalog/MET/climatologies/catalog.html">http://thredds.northwestknowledge.net:8080/thredds/catalog/MET/climatologies/catalog.html</a> |
|                       | vpd_Percentile      | Percentile range of vapor pressure deficit                      | <a href="http://thredds.northwestknowledge.net:8080/thredds/catalog/MET/climatologies/catalog.html">http://thredds.northwestknowledge.net:8080/thredds/catalog/MET/climatologies/catalog.html</a> |
|                       | erc_Percentile      | Percentile range of energy release component                    | <a href="http://thredds.northwestknowledge.net:8080/thredds/catalog/MET/climatologies/catalog.html">http://thredds.northwestknowledge.net:8080/thredds/catalog/MET/climatologies/catalog.html</a> |
| Climate Percentiles   | Ecoregion_US_L4CODE | Ecoregion level 4 code in the United States                     | <a href="https://www.epa.gov/eco-research/ecoregions-north-america">https://www.epa.gov/eco-research/ecoregions-north-america</a>                                                                 |
|                       | Ecoregion_US_L3CODE | Ecoregion level 3 code in the United States                     | <a href="https://www.epa.gov/eco-research/ecoregions-north-america">https://www.epa.gov/eco-research/ecoregions-north-america</a>                                                                 |
|                       | Ecoregion_NA_L3CODE | Ecoregion level 3 code in the United States, Canada, and Mexico | <a href="https://www.epa.gov/eco-research/ecoregions-north-america">https://www.epa.gov/eco-research/ecoregions-north-america</a>                                                                 |
|                       | Ecoregion_NA_L2CODE | Ecoregion level 2 code in the United States, Canada, and Mexico | <a href="https://www.epa.gov/eco-research/ecoregions-north-america">https://www.epa.gov/eco-research/ecoregions-north-america</a>                                                                 |
|                       | Ecoregion_NA_L1CODE | Ecoregion level 1 code in the United States, Canada, and Mexico | <a href="https://www.epa.gov/eco-research/ecoregions-north-america">https://www.epa.gov/eco-research/ecoregions-north-america</a>                                                                 |
| Digital Elevation Map | Elevation           | Elevation in m                                                  | <a href="https://landfire.gov/topographic.php">https://landfire.gov/topographic.php</a>                                                                                                           |
|                       | Aspect              | 0-360 indicating azimuth (0=N, 90=E, 180=S, 270=W)              | <a href="https://landfire.gov/topographic.php">https://landfire.gov/topographic.php</a>                                                                                                           |
|                       | Slope               | 0-90 degrees                                                    | <a href="https://landfire.gov/topographic.php">https://landfire.gov/topographic.php</a>                                                                                                           |
|                       | TPI                 | Topographic Position Index                                      | <a href="https://landfire.gov/topographic.php">https://landfire.gov/topographic.php</a>                                                                                                           |
|                       | TRI                 | Terrain Ruggedness Index                                        | <a href="https://landfire.gov/topographic.php">https://landfire.gov/topographic.php</a>                                                                                                           |

| Category                   | Variable      | Description                                                                                                                                       | Additional Information and Source                                                                                                                                                                                                                                                                                                                                                                                                                                                                                                                                                                                                                                                                   |
|----------------------------|---------------|---------------------------------------------------------------------------------------------------------------------------------------------------|-----------------------------------------------------------------------------------------------------------------------------------------------------------------------------------------------------------------------------------------------------------------------------------------------------------------------------------------------------------------------------------------------------------------------------------------------------------------------------------------------------------------------------------------------------------------------------------------------------------------------------------------------------------------------------------------------------|
|                            | Elevation_1km | Average elevation in 1 km radius around the ignition point                                                                                        | <a href="https://landfire.gov/topographic.php">https://landfire.gov/topographic.php</a>                                                                                                                                                                                                                                                                                                                                                                                                                                                                                                                                                                                                             |
|                            | Aspect_1km    | Average aspect in 1 km radius around the ignition point                                                                                           | <a href="https://landfire.gov/topographic.php">https://landfire.gov/topographic.php</a>                                                                                                                                                                                                                                                                                                                                                                                                                                                                                                                                                                                                             |
|                            | Slope_1km     | Average slope in 1 km radius around the ignition point                                                                                            | <a href="https://landfire.gov/topographic.php">https://landfire.gov/topographic.php</a>                                                                                                                                                                                                                                                                                                                                                                                                                                                                                                                                                                                                             |
|                            | TPI_1km       | Average Topographic Position Index in 1 km radius around the ignition point                                                                       | <a href="https://landfire.gov/topographic.php">https://landfire.gov/topographic.php</a>                                                                                                                                                                                                                                                                                                                                                                                                                                                                                                                                                                                                             |
|                            | TRI_1km       | Average Terrain Ruggedness Index in 1 km radius around the ignition point                                                                         | <a href="https://landfire.gov/topographic.php">https://landfire.gov/topographic.php</a>                                                                                                                                                                                                                                                                                                                                                                                                                                                                                                                                                                                                             |
| Vegetation                 | EVC           | Existing Vegetation Cover - vertically projected percent cover of the live canopy layer for a specific area (%)                                   | <a href="https://landfire.gov/evc.php">https://landfire.gov/evc.php</a>                                                                                                                                                                                                                                                                                                                                                                                                                                                                                                                                                                                                                             |
|                            | EVC_1km       | Existing Vegetation Cover in 1 km radius - vertically projected percent cover of the live canopy layer for a specific area (%)                    | <a href="https://landfire.gov/evc.php">https://landfire.gov/evc.php</a>                                                                                                                                                                                                                                                                                                                                                                                                                                                                                                                                                                                                                             |
|                            | EVH           | Existing Vegetation Height - average height of the dominant vegetation (m)                                                                        | <a href="https://landfire.gov/evh.php">https://landfire.gov/evh.php</a>                                                                                                                                                                                                                                                                                                                                                                                                                                                                                                                                                                                                                             |
|                            | EVH_1km       | Existing Vegetation Height in 1 km radius - average height of the dominant vegetation                                                             | <a href="https://landfire.gov/evh.php">https://landfire.gov/evh.php</a>                                                                                                                                                                                                                                                                                                                                                                                                                                                                                                                                                                                                                             |
|                            | EVT           | Existing Vegetation Type - complexes of plant communities representing NatureServe's terrestrial ecological systems classification                | <a href="https://landfire.gov/evt.php">https://landfire.gov/evt.php</a>                                                                                                                                                                                                                                                                                                                                                                                                                                                                                                                                                                                                                             |
|                            | EVT_1km       | Existing Vegetation Type in 1 km radius - complexes of plant communities representing NatureServe's terrestrial Ecological Systems classification | <a href="https://landfire.gov/evt.php">https://landfire.gov/evt.php</a>                                                                                                                                                                                                                                                                                                                                                                                                                                                                                                                                                                                                                             |
| Risk Management Assistance | Evacuation    | Estimated ground transport time in hours from the fire ignition point to a definitive care facility (hospital)                                    | <a href="https://firenet365.sharepoint.com/sites/RiskManagementAssistance/Shared%20Documents/Forms/AllItems.aspx?ga=1&amp;id=%2Fsites%2FRiskManagementAssistance%2FShared%20Documents%2FRMA%20Fires%2F%2BRMA%20Dashboard%20Analytics%2FEstimated%20Ground%20Evacuation%20%28from%20WFDSS%29&amp;viewid=3762ae89%2Dac1f%2D4678%2D9b67%2Ddf3979859dfe">https://firenet365.sharepoint.com/sites/RiskManagementAssistance/Shared%20Documents/Forms/AllItems.aspx?ga=1&amp;id=%2Fsites%2FRiskManagementAssistance%2FShared%20Documents%2FRMA%20Fires%2F%2BRMA%20Dashboard%20Analytics%2FEstimated%20Ground%20Evacuation%20%28from%20WFDSS%29&amp;viewid=3762ae89%2Dac1f%2D4678%2D9b67%2Ddf3979859dfe</a> |
|                            | SDI           | Suppression Difficulty Index (Rodriguez y Silva et al. 2020): relative difficulty of fire control                                                 | <a href="https://firenet365.sharepoint.com/sites/RiskManagementAssistance/Shared%20Documents/Forms/AllItems.aspx?ga=1&amp;id=%2Fsites%2FRiskManagementAssistance%2FShared%20Documents%2FRMA%20Fires%2F%2BRMA%20">https://firenet365.sharepoint.com/sites/RiskManagementAssistance/Shared%20Documents/Forms/AllItems.aspx?ga=1&amp;id=%2Fsites%2FRiskManagementAssistance%2FShared%20Documents%2FRMA%20Fires%2F%2BRMA%</a>                                                                                                                                                                                                                                                                           |

| Category                            | Variable              | Description                                                                                          | Additional Information and Source                                                                                                                                                                                                                                                                 |
|-------------------------------------|-----------------------|------------------------------------------------------------------------------------------------------|---------------------------------------------------------------------------------------------------------------------------------------------------------------------------------------------------------------------------------------------------------------------------------------------------|
|                                     |                       |                                                                                                      | 20Dashboard%20Analytics%2FSuppression%20Difficult%20Index%20%28SDI%29%2F2022%2FRaster&viewid=3762ae89%2Dac1f%2D4678%2D9b67%2Ddf3979859dfe                                                                                                                                                         |
| Fire Regime Gro                     | FRG                   | Fire regime group - presumed historical fire regime                                                  | <a href="https://landfire.gov/frg.php">https://landfire.gov/frg.php</a>                                                                                                                                                                                                                           |
|                                     | FRG_1km               | Fire regime group in 1 km radius of ignition point                                                   | <a href="https://landfire.gov/frg.php">https://landfire.gov/frg.php</a>                                                                                                                                                                                                                           |
| Fire Stations                       | No_FireStation_1.0km  | Number of fire stations in a 1 km radius around the fire ignition point                              | <a href="https://hifld-geoplatform.opendata.arcgis.com/datasets/0ccaf0c53b794eb8ac3d3de6afdb3286_0/explore?location=40.454087%2C-120.631622%2C4.30">https://hifld-geoplatform.opendata.arcgis.com/datasets/0ccaf0c53b794eb8ac3d3de6afdb3286_0/explore?location=40.454087%2C-120.631622%2C4.30</a> |
|                                     | No_FireStation_5.0km  | Number of fire stations in a 5 km radius around the fire ignition point                              | <a href="https://hifld-geoplatform.opendata.arcgis.com/datasets/0ccaf0c53b794eb8ac3d3de6afdb3286_0/explore?location=40.454087%2C-120.631622%2C4.31">https://hifld-geoplatform.opendata.arcgis.com/datasets/0ccaf0c53b794eb8ac3d3de6afdb3286_0/explore?location=40.454087%2C-120.631622%2C4.31</a> |
|                                     | No_FireStation_10.0km | Number of fire stations in a 10 km radius around the fire ignition point                             | <a href="https://hifld-geoplatform.opendata.arcgis.com/datasets/0ccaf0c53b794eb8ac3d3de6afdb3286_0/explore?location=40.454087%2C-120.631622%2C4.32">https://hifld-geoplatform.opendata.arcgis.com/datasets/0ccaf0c53b794eb8ac3d3de6afdb3286_0/explore?location=40.454087%2C-120.631622%2C4.32</a> |
|                                     | No_FireStation_20.0km | Number of fire stations in a 1 km radius around the fire ignition point                              | <a href="https://hifld-geoplatform.opendata.arcgis.com/datasets/0ccaf0c53b794eb8ac3d3de6afdb3286_0/explore?location=40.454087%2C-120.631622%2C4.33">https://hifld-geoplatform.opendata.arcgis.com/datasets/0ccaf0c53b794eb8ac3d3de6afdb3286_0/explore?location=40.454087%2C-120.631622%2C4.33</a> |
| Geographic Area Coordination Center | GACCAbbrev            | Geographical Area Coordination Center (GACC) abbreviation                                            |                                                                                                                                                                                                                                                                                                   |
|                                     | GACC_PL               | GACC Preparedness Level                                                                              |                                                                                                                                                                                                                                                                                                   |
|                                     | GACC_New fire         | Total number of new fires reported in each Geographic Area                                           |                                                                                                                                                                                                                                                                                                   |
|                                     | GACC_New LF           | Total number of new large fires that were previously not reported as a large fire in the IMSR report |                                                                                                                                                                                                                                                                                                   |

| <b>Category</b>            | <b>Variable</b>         | <b>Description</b>                                                                                                                                                                                                                                                                                                                                                                                                              | <b>Additional Information and Source</b>                                                                                                                                                                        |
|----------------------------|-------------------------|---------------------------------------------------------------------------------------------------------------------------------------------------------------------------------------------------------------------------------------------------------------------------------------------------------------------------------------------------------------------------------------------------------------------------------|-----------------------------------------------------------------------------------------------------------------------------------------------------------------------------------------------------------------|
|                            | GACC_Uncont LF          | Total number of uncontained large fires burning within the geographic area                                                                                                                                                                                                                                                                                                                                                      |                                                                                                                                                                                                                 |
|                            | GACC_Type 1 IMTs        | Number of Type 1 Incident Management Teams assigned within the geographic area                                                                                                                                                                                                                                                                                                                                                  |                                                                                                                                                                                                                 |
|                            | GACC_Type 2 IMTs        | Number of Type 2 Incident Management Teams assigned within the geographic area                                                                                                                                                                                                                                                                                                                                                  |                                                                                                                                                                                                                 |
|                            | GACC_NIMO Teams         | Number of National Incident Management Organization Teams assigned within the geographic area                                                                                                                                                                                                                                                                                                                                   |                                                                                                                                                                                                                 |
|                            | GACC_Area Command Teams | Number of Area Command Teams assigned within the geographic area                                                                                                                                                                                                                                                                                                                                                                |                                                                                                                                                                                                                 |
|                            | GACC_Fire Use Teams     | Number of Fire Use Teams assigned within the geographic area                                                                                                                                                                                                                                                                                                                                                                    |                                                                                                                                                                                                                 |
| Gap Analysis Project (GAP) | Mang_Type               | The Manager type (Mang_Type) domain code and Manager Type domain description (MngTp_Desc) describes the general land manager description standardized for the U.S. See PAD-US Data Manual for “Agency Name to Agency Type Crosswalk” or geodatabase look up table for full domain descriptions. The domain code 'UNK' is assigned to non-padus areas within Census state boundaries.                                            | <a href="https://www.usgs.gov/core-science-systems/science-analytics-and-synthesis/gap/pad-us-data-manual">https://www.usgs.gov/core-science-systems/science-analytics-and-synthesis/gap/pad-us-data-manual</a> |
|                            | Mang_Name               | The Manager Name (Mang_Nm) domain code and Manager Name domain description (MngNm_Desc) describe the land manager or administrative agency standardized for the U.S. See PAD-US Data Manual or geodatabase look up table for 'Agency Name'. The domain code 'UNK' is assigned to non-padus areas within Census state boundaries.                                                                                                | <a href="https://www.usgs.gov/core-science-systems/science-analytics-and-synthesis/gap/pad-us-data-manual">https://www.usgs.gov/core-science-systems/science-analytics-and-synthesis/gap/pad-us-data-manual</a> |
|                            | Des_Tp                  | The Designation Type (Des_Tp) domain code and Designation Type (Des_TpDesc) domain description define the unit's land management designation standardized for the U.S. (e.g. 'Area of Critical Environmental Concern', 'Wilderness Area', 'State Park', 'Local Recreation Area', 'Conservation Easement'). See the PAD-US Data Manual for a crosswalk of 'Designation Type' from source data where 'Local Designation Type' may | <a href="https://www.usgs.gov/core-science-systems/science-analytics-and-synthesis/gap/pad-us-data-manual">https://www.usgs.gov/core-science-systems/science-analytics-and-synthesis/gap/pad-us-data-manual</a> |

| Category               | Variable  | Description                                                                                                                                                                                                                                                                                                                                                                                                                                                                                                                                                                                                                                                                                                                                                                                                                                                                                                                    | Additional Information and Source                                                                                                                                                                               |
|------------------------|-----------|--------------------------------------------------------------------------------------------------------------------------------------------------------------------------------------------------------------------------------------------------------------------------------------------------------------------------------------------------------------------------------------------------------------------------------------------------------------------------------------------------------------------------------------------------------------------------------------------------------------------------------------------------------------------------------------------------------------------------------------------------------------------------------------------------------------------------------------------------------------------------------------------------------------------------------|-----------------------------------------------------------------------------------------------------------------------------------------------------------------------------------------------------------------|
|                        |           | include related designations in various formats (e.g. NWSR, National Recreation River, National Scenic River, Eligible - Recreational, Eligible - Wild, etc.). 'Designation Type' supports PAD-US queries and the categorical assignment of conservation measures (i.e. 'GAP Status Code', 'IUCN Category') and 'Public Access' in the absence of other information. The domain code 'UNK' is assigned to non-padus areas within the Census state boundary. It is not recommended to use Designation Type (Des_Tp) to query area (GIS_Acres) for specific designation types in the Raster Analysis Files as this field describes the result of the prioritization process to remove overlapping designations. Use the full inventory geodatabase (PAD_US3_0.gdb, <a href="https://doi.org/10.5066/P9Q9LQ4B">https://doi.org/10.5066/P9Q9LQ4B</a> ) for Designation Type (Des_Tp) queries to obtain the original boundary area. |                                                                                                                                                                                                                 |
|                        | GAP_Sts   | The 'GAP Status Code' domain code (GAP_Sts) and 'GAP Status Code' domain description (GAP_StsDes) classify management intent to conserve biodiversity. See PAD-US Data Manual for more information. The domain code '4' is assigned to non-padus areas within the Census state boundary. See PAD-US Data Manual for more information, including the GAP Status Code Assignment reference document that includes detailed GAP Status Code definitions, assumptions, criteria, and assignment methods.<br><a href="https://www.usgs.gov/core-science-systems/science-analytics-and-synthesis/gap/pad-us-data-manual">https://www.usgs.gov/core-science-systems/science-analytics-and-synthesis/gap/pad-us-data-manual</a>                                                                                                                                                                                                        | <a href="https://www.usgs.gov/core-science-systems/science-analytics-and-synthesis/gap/pad-us-data-manual">https://www.usgs.gov/core-science-systems/science-analytics-and-synthesis/gap/pad-us-data-manual</a> |
|                        | GAP_Prity | The GAP Status Code reclassified to maintain prioritization during the Raster Analysis File development process. The GAP Priority (GAP_Prity) field was added during the Vector Analysis File prioritization process to facilitate rasterization from the vector file, as rasters prioritize higher numbers (Gap_Sts 1 becomes Gap_Prity 9, Gap_Sts 2 becomes Gap_Prity 8, Gap_Sts 3 becomes Gap_Prity 7, Gap_Sts 4 becomes Gap_Prity 6, Non-PADUS areas included through the boundaries of interest to stakeholders (State, Congressional District, County, Department of the Interior Region, EcoRegions I-IV, Landscape Conservation Cooperative, Urban Areas).                                                                                                                                                                                                                                                             | <a href="https://www.usgs.gov/core-science-systems/science-analytics-and-synthesis/gap/pad-us-data-manual">https://www.usgs.gov/core-science-systems/science-analytics-and-synthesis/gap/pad-us-data-manual</a> |
| Gross Domestic Product | GDP       | Annual Gross Domestic Product Per Capita                                                                                                                                                                                                                                                                                                                                                                                                                                                                                                                                                                                                                                                                                                                                                                                                                                                                                       | <a href="https://datadryad.org/stash/dataset/doi:10.5061/dryad.dk1j0">https://datadryad.org/stash/dataset/doi:10.5061/dryad.dk1j0</a>                                                                           |

| Category                            | Variable       | Description                                                                                                                                                                                                                                         | Additional Information and Source                                                                                                                                                                           |
|-------------------------------------|----------------|-----------------------------------------------------------------------------------------------------------------------------------------------------------------------------------------------------------------------------------------------------|-------------------------------------------------------------------------------------------------------------------------------------------------------------------------------------------------------------|
| Global Human Modification           | GHM            | Cumulative measure of the human modification of lands within 1 km of the fire ignition point                                                                                                                                                        | <a href="https://sedac.ciesin.columbia.edu/data/set/lulc-human-modification-terrestrial-systems">https://sedac.ciesin.columbia.edu/data/set/lulc-human-modification-terrestrial-systems</a>                 |
| MODIS NDVI                          | MOD_NDVI_12m   | Monthly NDVI in the 12 months prior to fire discovery                                                                                                                                                                                               | <a href="https://lpdaac.usgs.gov/products/mod13c2v061/">https://lpdaac.usgs.gov/products/mod13c2v061/</a>                                                                                                   |
|                                     | MOD_EVI_12m    | Monthly EVI in the 12 months prior to fire discovery                                                                                                                                                                                                | <a href="https://lpdaac.usgs.gov/products/mod13c2v061/">https://lpdaac.usgs.gov/products/mod13c2v061/</a>                                                                                                   |
| NOAA NDVI                           | NDVI_min       | Monthly minimum NDVI for the point of ignition in the 12 months prior to fire discovery                                                                                                                                                             | <a href="https://www.ncei.noaa.gov/products/climate-data-records/normalized-difference-vegetation-index">https://www.ncei.noaa.gov/products/climate-data-records/normalized-difference-vegetation-index</a> |
|                                     | NDVI_max       | Monthly maximum NDVI for the point of ignition in the 12 months prior to fire discovery                                                                                                                                                             | <a href="https://www.ncei.noaa.gov/products/climate-data-records/normalized-difference-vegetation-index">https://www.ncei.noaa.gov/products/climate-data-records/normalized-difference-vegetation-index</a> |
|                                     | NDVI_mean      | Monthly mean NDVI for the point of ignition in the 12 months prior to fire discovery                                                                                                                                                                | <a href="https://www.ncei.noaa.gov/products/climate-data-records/normalized-difference-vegetation-index">https://www.ncei.noaa.gov/products/climate-data-records/normalized-difference-vegetation-index</a> |
|                                     | NDVI-1day      | NDVI on the day prior to ignition                                                                                                                                                                                                                   | <a href="https://www.ncei.noaa.gov/products/climate-data-records/normalized-difference-vegetation-index">https://www.ncei.noaa.gov/products/climate-data-records/normalized-difference-vegetation-index</a> |
| National Land Cover Database (NLCD) | Land_Cover     | Land cover at the fire ignition point for the year of the fire, or the closest year prior to ignition for which data are available. NLCD 2019 contains 34 products characterizing land cover and land cover change across 8 periods from 2001-2019. | <a href="https://www.mrlc.gov/">https://www.mrlc.gov/</a>                                                                                                                                                   |
|                                     | Land_Cover_1km | Three dominant land cover types at the fire ignition point for the year of the fire, or the closest year prior to ignition for which data are available                                                                                             | <a href="https://www.mrlc.gov/">https://www.mrlc.gov/</a>                                                                                                                                                   |
| National Preparedness Level (NPL)   | NPL            | National Preparedness Level                                                                                                                                                                                                                         | <a href="https://www.nifc.gov/nicc/incident-information/imsr">https://www.nifc.gov/nicc/incident-information/imsr</a><br>doi: 10.5281/zenodo.7901237                                                        |
| Population                          | Population     | Population density at the fire ignition point                                                                                                                                                                                                       | <a href="https://hub.worldpop.org/geodata/summary?id=44751">https://hub.worldpop.org/geodata/summary?id=44751</a>                                                                                           |
|                                     | Popo_1km       | Average population density within a 1 km radius around the fire ignition point                                                                                                                                                                      | <a href="https://hub.worldpop.org/geodata/summary?id=44751">https://hub.worldpop.org/geodata/summary?id=44751</a>                                                                                           |

| Category                         | Variable             | Description                                                     | Additional Information and Source                                                                                                                                                         |
|----------------------------------|----------------------|-----------------------------------------------------------------|-------------------------------------------------------------------------------------------------------------------------------------------------------------------------------------------|
| Pyrome                           | NAME                 | Pyrome name                                                     | <a href="https://www.fs.usda.gov/rds/archive/catalog/RDS-2020-0020">https://www.fs.usda.gov/rds/archive/catalog/RDS-2020-0020</a>                                                         |
| Road                             | road_county_dis      | Distance from country road (m)                                  | <a href="https://www.census.gov/geographies/mapping-files/time-series/geo/tiger-line-file.html">https://www.census.gov/geographies/mapping-files/time-series/geo/tiger-line-file.html</a> |
|                                  | road_interstate_dis  | Distance from interstate road (m)                               | <a href="https://www.census.gov/geographies/mapping-files/time-series/geo/tiger-line-file.html">https://www.census.gov/geographies/mapping-files/time-series/geo/tiger-line-file.html</a> |
|                                  | road_common_name_dis | Distance from common name road (m)                              | <a href="https://www.census.gov/geographies/mapping-files/time-series/geo/tiger-line-file.html">https://www.census.gov/geographies/mapping-files/time-series/geo/tiger-line-file.html</a> |
|                                  | road_other_dis       | Distance from other road (m)                                    | <a href="https://www.census.gov/geographies/mapping-files/time-series/geo/tiger-line-file.html">https://www.census.gov/geographies/mapping-files/time-series/geo/tiger-line-file.html</a> |
|                                  | road_state_dis       | Distance from state road (m)                                    | <a href="https://www.census.gov/geographies/mapping-files/time-series/geo/tiger-line-file.html">https://www.census.gov/geographies/mapping-files/time-series/geo/tiger-line-file.html</a> |
|                                  | road_US_dis          | Distance from US road (m)                                       | <a href="https://www.census.gov/geographies/mapping-files/time-series/geo/tiger-line-file.html">https://www.census.gov/geographies/mapping-files/time-series/geo/tiger-line-file.html</a> |
| Social Vulnerability Index (SVI) | RPL_THEMES           | Overall percentile ranking                                      | <a href="https://www.atsdr.cdc.gov/placeandhealth/svi/data_documentation_download.html">https://www.atsdr.cdc.gov/placeandhealth/svi/data_documentation_download.html</a>                 |
|                                  | RPL_THEME1           | Percentile ranking for Socioeconomic theme summary              | <a href="https://www.atsdr.cdc.gov/placeandhealth/svi/data_documentation_download.html">https://www.atsdr.cdc.gov/placeandhealth/svi/data_documentation_download.html</a>                 |
|                                  | EPL_POV              | Percentile Percentage of persons below poverty estimate         | <a href="https://www.atsdr.cdc.gov/placeandhealth/svi/data_documentation_download.html">https://www.atsdr.cdc.gov/placeandhealth/svi/data_documentation_download.html</a>                 |
|                                  | EPL_UNEMP            | Percentile Percentage of civilian (age 16+) unemployed estimate | <a href="https://www.atsdr.cdc.gov/placeandhealth/svi/data_documentation_download.html">https://www.atsdr.cdc.gov/placeandhealth/svi/data_documentation_download.html</a>                 |
|                                  | EPL_PCI              | Percentile per capita income estimate                           | <a href="https://www.atsdr.cdc.gov/placeandhealth/svi/data_documentation_download.html">https://www.atsdr.cdc.gov/placeandhealth/svi/data_documentation_download.html</a>                 |

| <b>Category</b> | <b>Variable</b> | <b>Description</b>                                                                           | <b>Additional Information and Source</b>                                                                                                                                  |
|-----------------|-----------------|----------------------------------------------------------------------------------------------|---------------------------------------------------------------------------------------------------------------------------------------------------------------------------|
|                 | EPL_NOHSDP      | Percentile Percentage of persons with no high school diploma (age 25+) estimate              | <a href="https://www.atsdr.cdc.gov/placeandhealth/svi/data_documentation_download.html">https://www.atsdr.cdc.gov/placeandhealth/svi/data_documentation_download.html</a> |
|                 | RPL_THEME2      | Percentile ranking for Household Composition theme summary                                   | <a href="https://www.atsdr.cdc.gov/placeandhealth/svi/data_documentation_download.html">https://www.atsdr.cdc.gov/placeandhealth/svi/data_documentation_download.html</a> |
|                 | EPL_AGE65       | Percentile percentage of persons aged 65 and older estimate                                  | <a href="https://www.atsdr.cdc.gov/placeandhealth/svi/data_documentation_download.html">https://www.atsdr.cdc.gov/placeandhealth/svi/data_documentation_download.html</a> |
|                 | EPL_AGE17       | Percentile percentage of persons aged 17 and younger estimate                                | <a href="https://www.atsdr.cdc.gov/placeandhealth/svi/data_documentation_download.html">https://www.atsdr.cdc.gov/placeandhealth/svi/data_documentation_download.html</a> |
|                 | EPL_DISABL      | Percentile percentage of civilian noninstitutionalized population with a disability estimate | <a href="https://www.atsdr.cdc.gov/placeandhealth/svi/data_documentation_download.html">https://www.atsdr.cdc.gov/placeandhealth/svi/data_documentation_download.html</a> |
|                 | EPL_SNGPNT      | Percentile percentage of single parent households with children under 18 estimate            | <a href="https://www.atsdr.cdc.gov/placeandhealth/svi/data_documentation_download.html">https://www.atsdr.cdc.gov/placeandhealth/svi/data_documentation_download.html</a> |
|                 | RPL_THEME3      | Percentile ranking for Minority Status/Language theme                                        | <a href="https://www.atsdr.cdc.gov/placeandhealth/svi/data_documentation_download.html">https://www.atsdr.cdc.gov/placeandhealth/svi/data_documentation_download.html</a> |
|                 | EPL_MINRTY      | Percentile percentage minority (all persons except white, non-Hispanic) estimate             | <a href="https://www.atsdr.cdc.gov/placeandhealth/svi/data_documentation_download.html">https://www.atsdr.cdc.gov/placeandhealth/svi/data_documentation_download.html</a> |
|                 | EPL_LIMENG      | Percentile percentage of persons (age 5+) who speak English "less than well" estimate        | <a href="https://www.atsdr.cdc.gov/placeandhealth/svi/data_documentation_download.html">https://www.atsdr.cdc.gov/placeandhealth/svi/data_documentation_download.html</a> |
|                 | RPL_THEME4      | Percentile ranking for Housing Type/Transportation theme                                     | <a href="https://www.atsdr.cdc.gov/placeandhealth/svi/data_documentation_download.html">https://www.atsdr.cdc.gov/placeandhealth/svi/data_documentation_download.html</a> |
|                 | EPL_MUNIT       | Percentile percentage housing in structures with 10 or more units estimate                   | <a href="https://www.atsdr.cdc.gov/placeandhealth/svi/data_documentation_download.html">https://www.atsdr.cdc.gov/placeandhealth/svi/data_documentation_download.html</a> |
|                 | EPL_MOBILE      | Percentile percentage mobile homes estimate                                                  | <a href="https://www.atsdr.cdc.gov/placeandhealth/svi/data_documentation_download.html">https://www.atsdr.cdc.gov/placeandhealth/svi/data_documentation_download.html</a> |



| <b>Category</b>      | <b>Variable</b> | <b>Description</b>                                                      | <b>Additional Information and Source</b>                                                                                                                                  |
|----------------------|-----------------|-------------------------------------------------------------------------|---------------------------------------------------------------------------------------------------------------------------------------------------------------------------|
|                      | EPL_CROWD       | Percentile percentage households with more people than rooms estimate   | <a href="https://www.atsdr.cdc.gov/placeandhealth/svi/data_documentation_download.html">https://www.atsdr.cdc.gov/placeandhealth/svi/data_documentation_download.html</a> |
|                      | EPL_NOVEH       | Percentile percentage households with no vehicle available estimate     | <a href="https://www.atsdr.cdc.gov/placeandhealth/svi/data_documentation_download.html">https://www.atsdr.cdc.gov/placeandhealth/svi/data_documentation_download.html</a> |
|                      | EPL_GROUPQ      | Percentile percentage of persons in group quarters estimate             | <a href="https://www.atsdr.cdc.gov/placeandhealth/svi/data_documentation_download.html">https://www.atsdr.cdc.gov/placeandhealth/svi/data_documentation_download.html</a> |
| Rangeland Production | rpms            | Annual vegetation biomass production at the ignition point              | <a href="https://www.atsdr.cdc.gov/placeandhealth/svi/data_documentation_download.html">s/development-rangeland-production-monitoring-service-cc</a>                      |
|                      | rpms_1km        | Annual vegetation production in a 1 km radius around the ignition point | <a href="https://www.atsdr.cdc.gov/placeandhealth/svi/data_documentation_download.html">s/development-rangeland-production-monitoring-service-cc</a>                      |

Table S2. Climatic variables and fire indices from FPA FOD-Attributes (white background) and (Khorshidi et al., 2020) (green background; variables indicated with “\_ref”).

| <b>Fire name</b>      | <b>Nichols</b> | <b>Pedley</b> | <b>166</b> | <b>Aliso</b> | <b>Evening</b> | <b>Banner</b> | <b>Otay 28</b> |
|-----------------------|----------------|---------------|------------|--------------|----------------|---------------|----------------|
| <b>Fire year</b>      | 1995           | 2010          | 2011       | 2002         | 2002           | 1999          | 1996           |
| <b>Discovery date</b> | 7/2/1995       | 5/12/2010     | 7/12/2011  | 3/21/2002    | 4/21/2002      | 6/9/1999      | 4/15/1996      |
| <b>fm100</b>          | 11             | 12.2          | 8.5        | 10.8         | 11.7           | 9.3           | 11.2           |
| <b>fm100_ref</b>      | 10.96          | 12.17         | 8.46       | 10.84        | 11.72          | 9.28          | 11.16          |
| <b>fm1000</b>         | 13.1           | 13.3          | 10.1       | 13           | 12.8           | 11.9          | 14.9           |
| <b>fm1000_ref</b>     | 13.09          | 13.32         | 10.11      | 12.97        | 12.75          | 11.9          | 14.92          |
| <b>erc</b>            | 50             | 50            | 64         | 50           | 49             | 57            | 45             |
| <b>erc_ref</b>        | 50.78          | 50.103        | 66.412     | 50.321       | 49.288         | 57.999        | 44.299         |
| <b>bi</b>             | 41             | 42            | 48         | 37           | 36             | 51            | 32             |
| <b>bi_ref</b>         | 40.5           | 41.84         | 48.16      | 36.62        | 35.6           | 51.22         | 32.16          |
| <b>vpd</b>            | 1.92           | 1.39          | 1.68       | 0.95         | 0.93           | 1.32          | 1.6            |
| <b>vpd_ref</b>        | 1.92           | 1.39          | 1.68       | 0.95         | 0.93           | 1.32          | 1.6            |

Table S3. Seven large fires across the United States selected for analysis of the temporal evolution of fire attributes.

| <b>Fire Name</b> | <b>State</b> | <b>Discovery Date</b> | <b>Containment Duration (days)</b> | <b>Fire Size (ha)</b> |
|------------------|--------------|-----------------------|------------------------------------|-----------------------|
| I-40             | TX           | 3/12/2006             | 7                                  | 173,083               |
| Florida Bugaboo  | FL           | 5/8/2007              | 43                                 | 49,782                |
| Camp             | CA           | 11/8/2018             | 17                                 | 62,053                |
| Cameron Peak     | CO           | 8/13/2020             | 111                                | 84,544                |
| Two Four Two     | OR           | 9/7/2020              | 33                                 | 5,857                 |
| Slater           | CA           | 9/8/2020              | 95                                 | 63,645                |
| East Troublesome | CO           | 10/14/2020            | 47                                 | 78,433                |

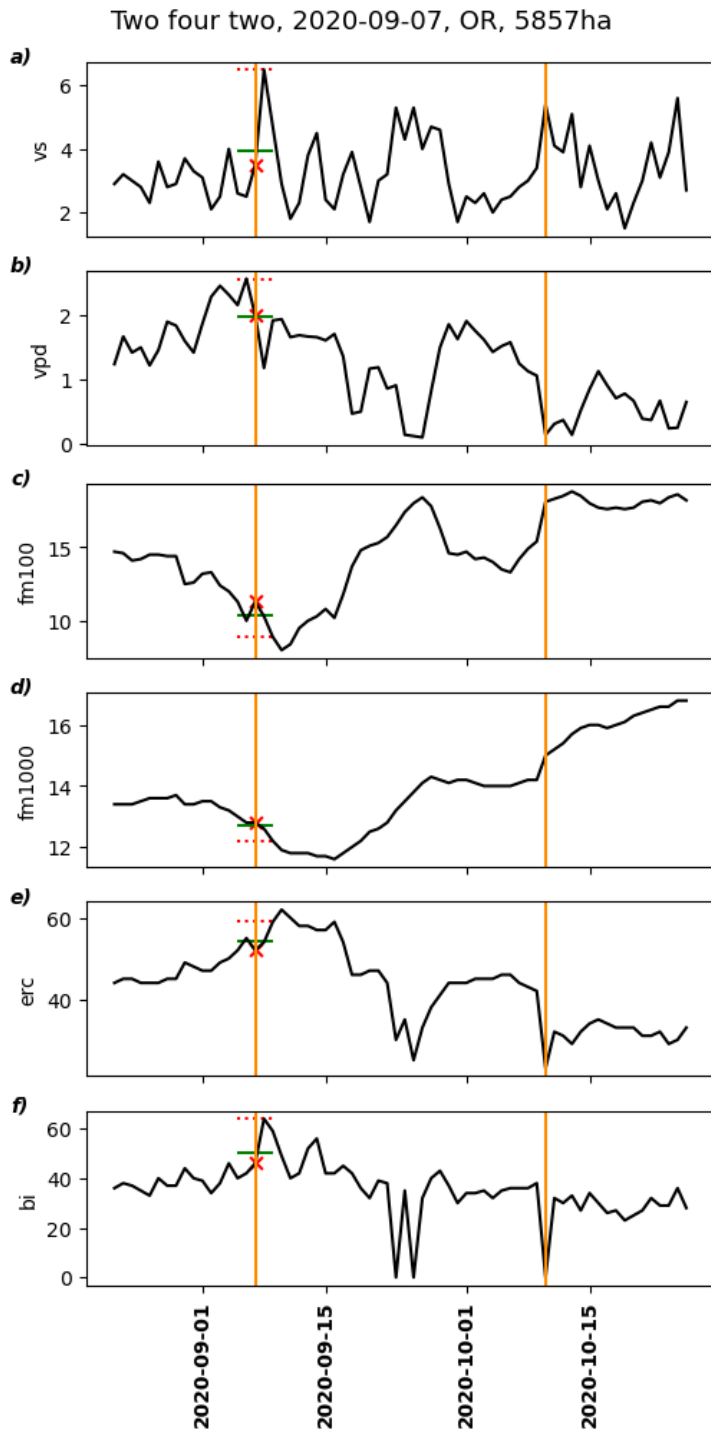

Figure S1. Evolution of meteorological and fire danger indices from late August to late October 2020 at the ignition point of the “Two four Two” fire in Oregon. Fire discovery and containment dates are indicated with vertical orange lines, the attribute value at the date of ignition is indicated with red asterisks, and the attributes’ five-day average and maximum (VS, VPD, ERC, BI) or minimum (FM100, FM1000) value are indicated with green and red horizontal lines. Evolution of weather variables and fire danger indices match those indicated in the news media: <https://ktvz.com/news/fire-alert/2020/09/08/two-four-two-fire-near-chiloquin-triples-in-size-to-6000-acres-new-evacuations/>

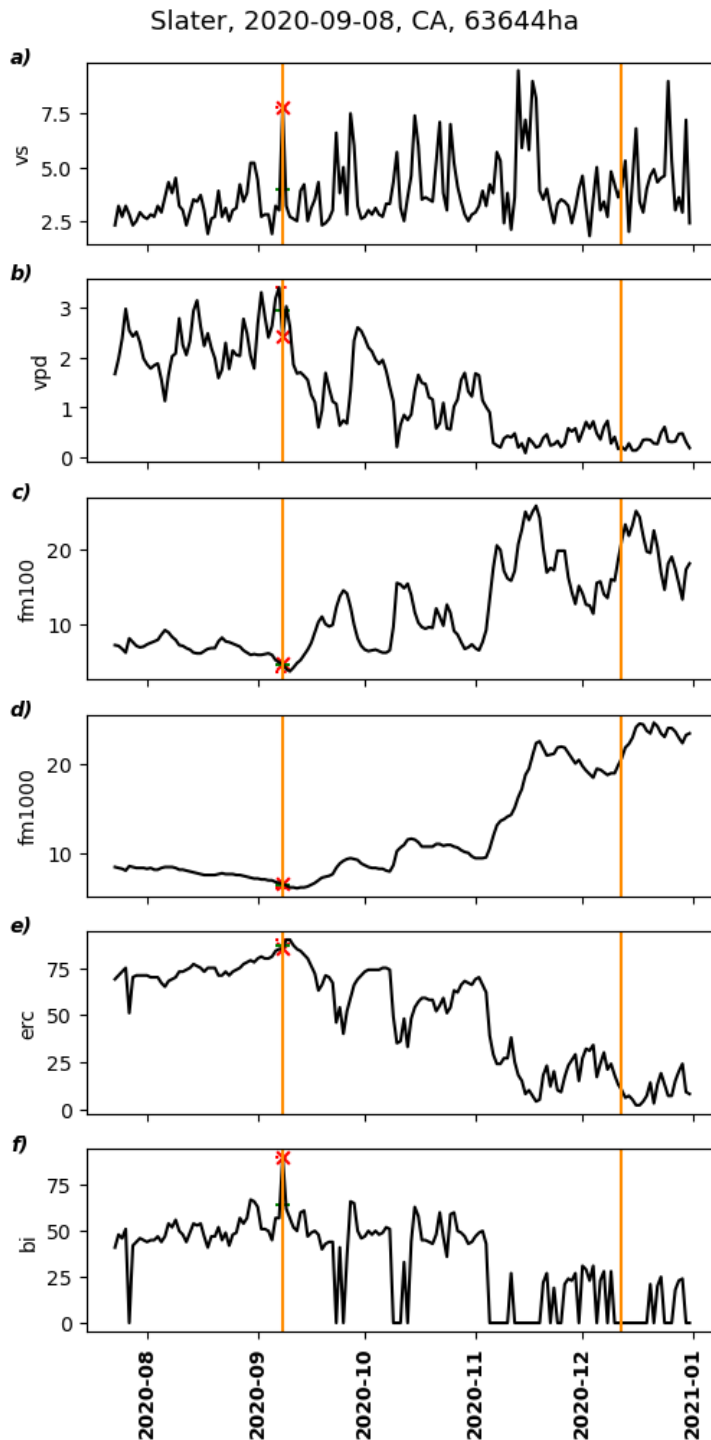

Figure S2. Evolution of meteorological and fire danger indices from late July to late December 2020 at the ignition point of the Slater fire in California. Fire discovery and containment dates are indicated with vertical orange lines, the attribute value at the date of ignition is indicated with red asterisks, and the attributes' five-day average and maximum (VS, VPD, ERC, BI) or minimum (FM100, FM1000) value are indicated with green and red horizontal lines. Evolution of weather variables and fire danger indices match those indicated in the National Weather Service report at

<https://storymaps.arcgis.com/stories/2e89e20bc5bf473686248b836cbd3721>

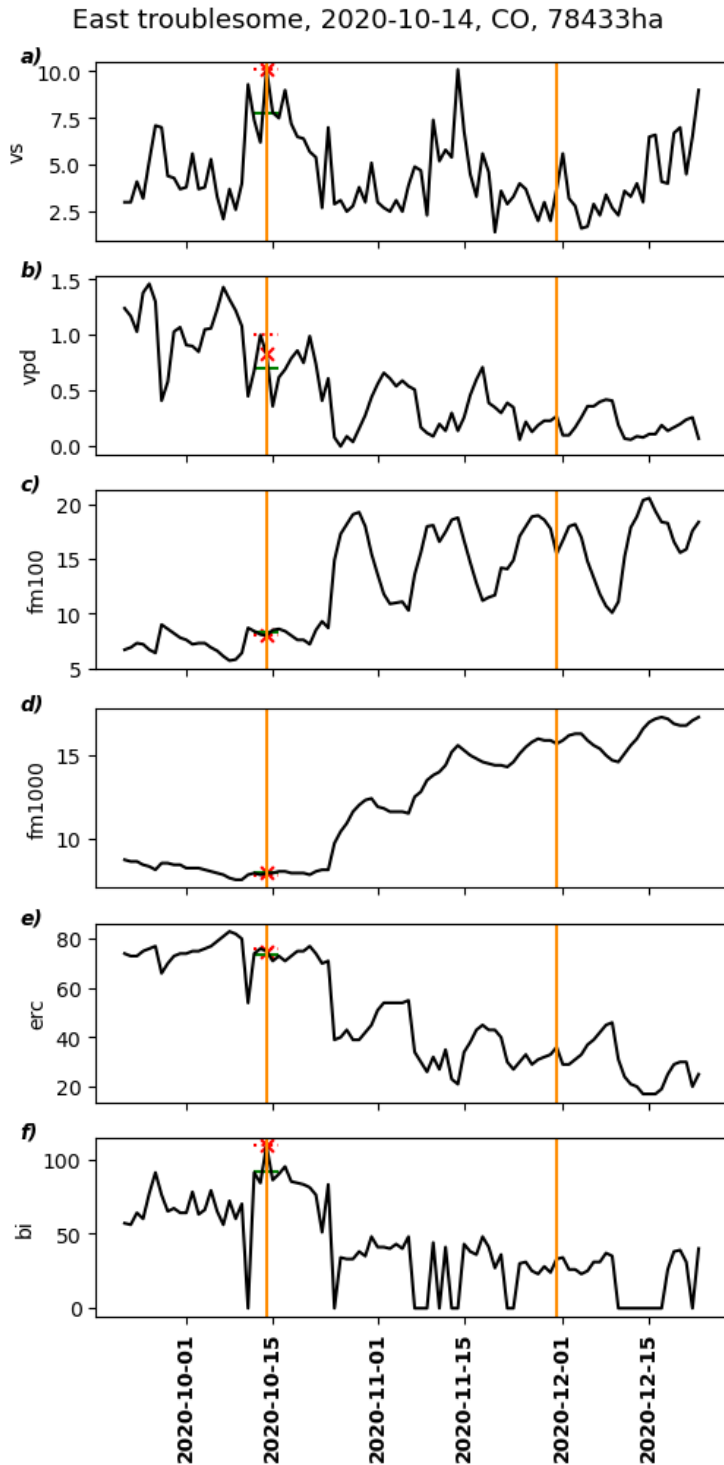

Figure S3. Evolution of meteorological and fire danger indices from late September to late December 2020 at the ignition point of the East Troublesome fire in Colorado. Fire discovery and containment dates are indicated with vertical orange lines, the attribute value at the date of ignition is indicated with red asterisks, and the attributes' five-day average and maximum (VS, VPD, ERC, BI) or minimum (FM100, FM1000) values are indicated with green and red horizontal lines. Evolution of weather variables and fire danger indices match those indicated in the National Weather Service report at

<https://storymaps.arcgis.com/stories/d8ef7c5f041d446e8931fc4498b3cad40>

Cameron peak, 2020-08-13, CO, 84544ha

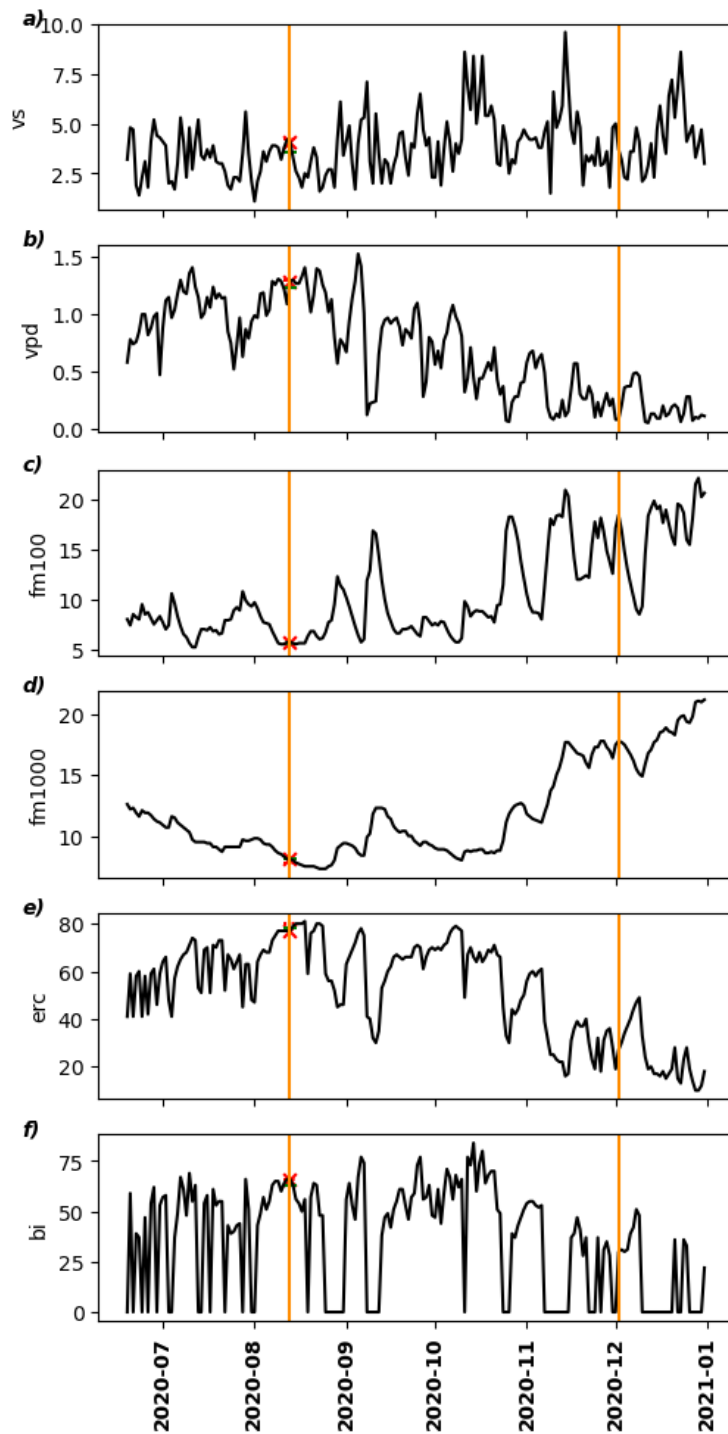

Figure S4. Evolution of meteorological and fire danger indices from late June to late December 2020 at the ignition point of the Cameron Peak fire in Colorado. Fire discovery and containment dates are indicated with vertical orange lines, the attribute value at the date of ignition is indicated with red asterisks, and the attributes' five-day average and maximum (VS, VPD, ERC, BI) or minimum (FM100, FM1000) values are indicated with green and red horizontal lines. Evolution of weather variables and fire danger indices match those indicated in the news media: <https://www.coloradoan.com/story/news/2020/09/11/cameron-peak-fire-map-timelapse-shows-growth-fire/5770398002/>

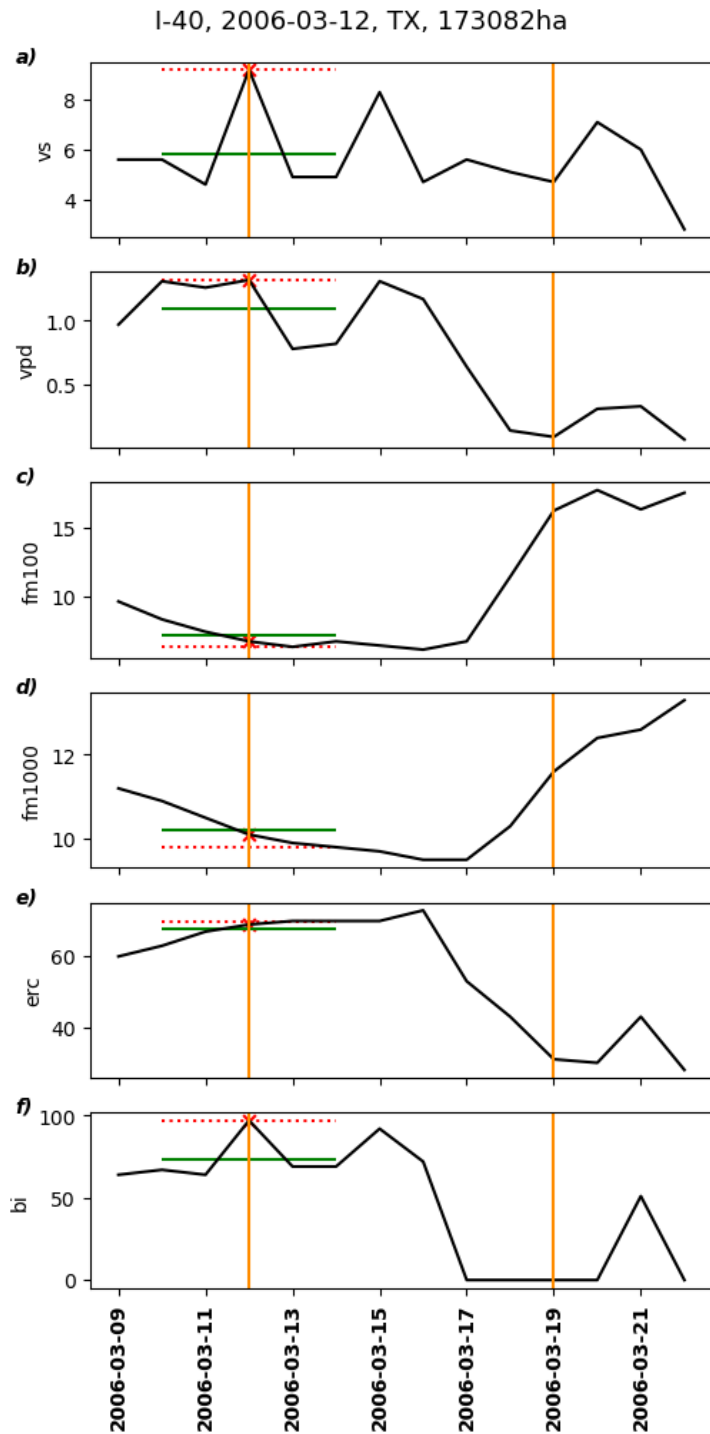

Figure S5. Evolution of meteorological and fire danger indices in March 2006 at the ignition point of the I-40 fire in Texas. Fire discovery and containment dates are indicated with vertical orange lines, the attribute value at the date of ignition is indicated with red asterisks, and the attributes' five-day average and maximum (VS, VPD, ERC, BI) or minimum (FM100, FM1000) value are indicated with green and red horizontal lines. Evolution of weather variables and fire danger indices match those indicated in the news media: <https://abc7amarillo.com/news/local/11th-anniversary-of-deadly-2006-texas-panhandle-wildfires>



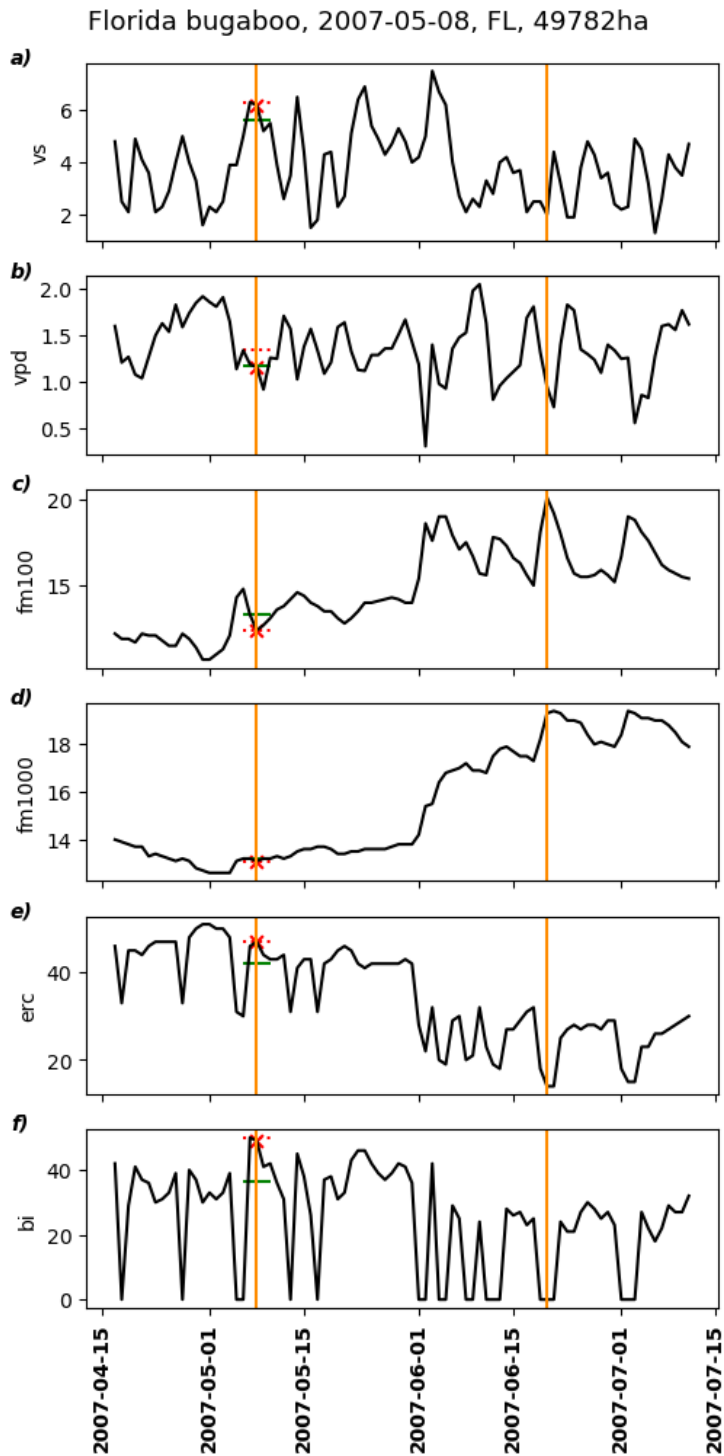

Figure S6. Evolution of meteorological and fire danger indices from mid-April to mid July 2007 at the ignition point of the Bugaboo fire in Florida. Fire discovery and containment dates are indicated with vertical orange lines, the attribute value at the date of ignition is indicated with red asterisks, and the attributes' five-day average and maximum (VS, VPD, ERC, BI) or minimum (FM100, FM1000) values are indicated with green and red horizontal lines. Evolution of weather variables and fire danger indices match those indicated in the news media and official reports at <https://earthobservatory.nasa.gov/images/7682/bugaboo-fire-rages-in-georgia-and-florida>

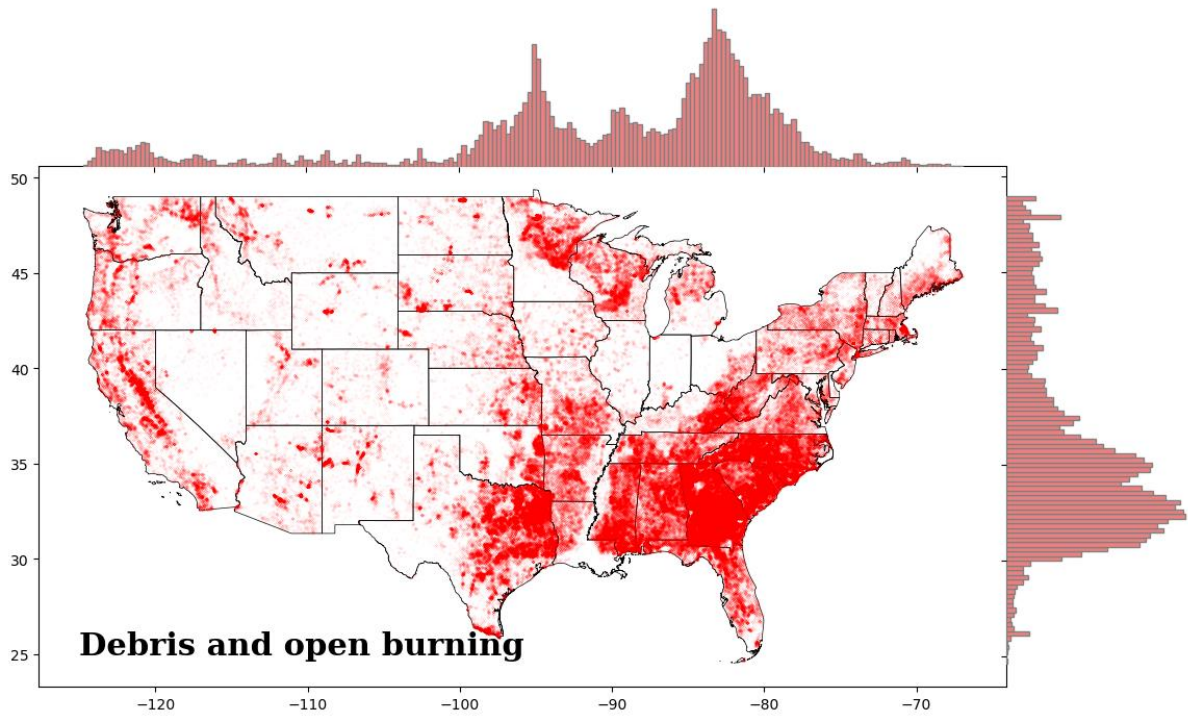

Figure S7. Spatial distribution of fire ignitions caused by debris and open burning in the contiguous United States from 1992-2020.

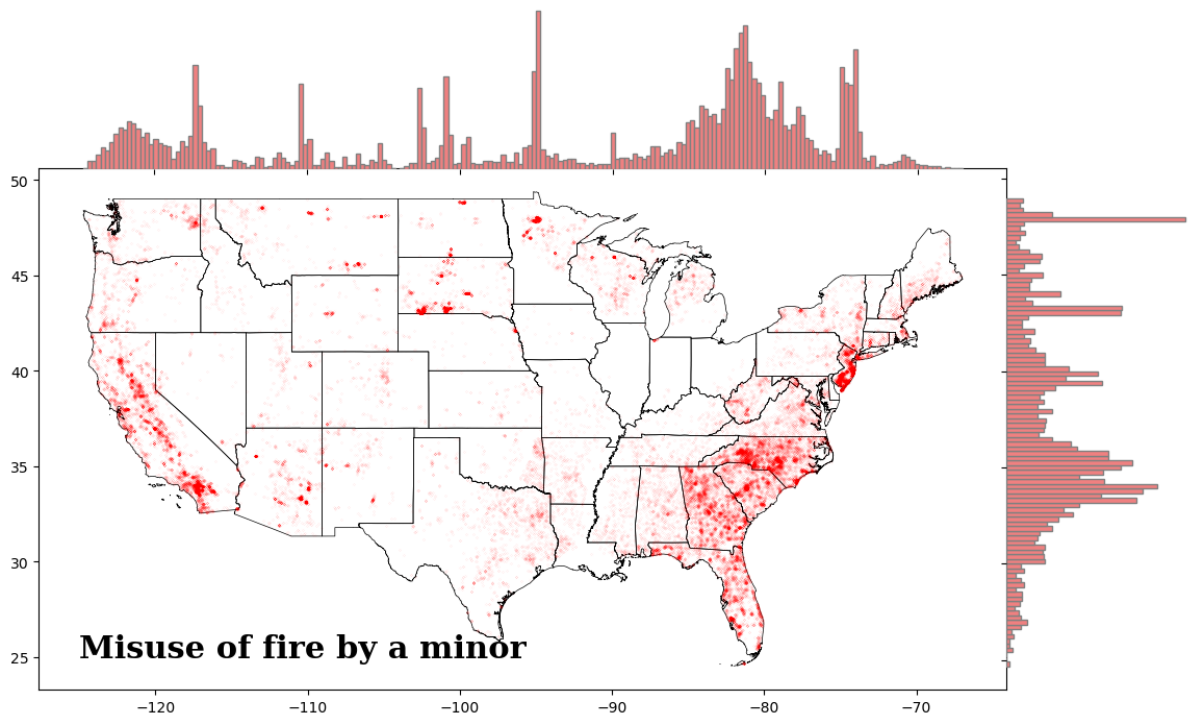

Figure S8. Spatial distribution of fire ignitions caused by misuse of fire by a minor in the contiguous United States from 1992-2020.

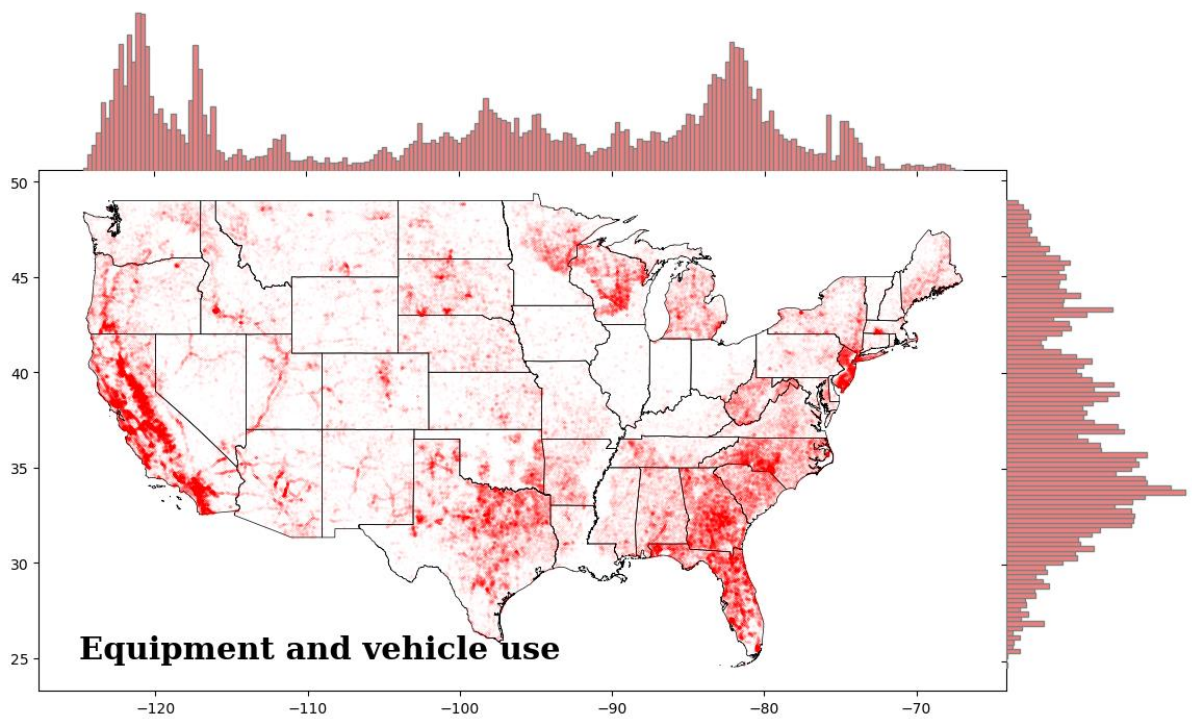

Figure S9. Spatial distribution of fire ignitions caused by equipment and vehicle use in the contiguous United States from 1992-2020.

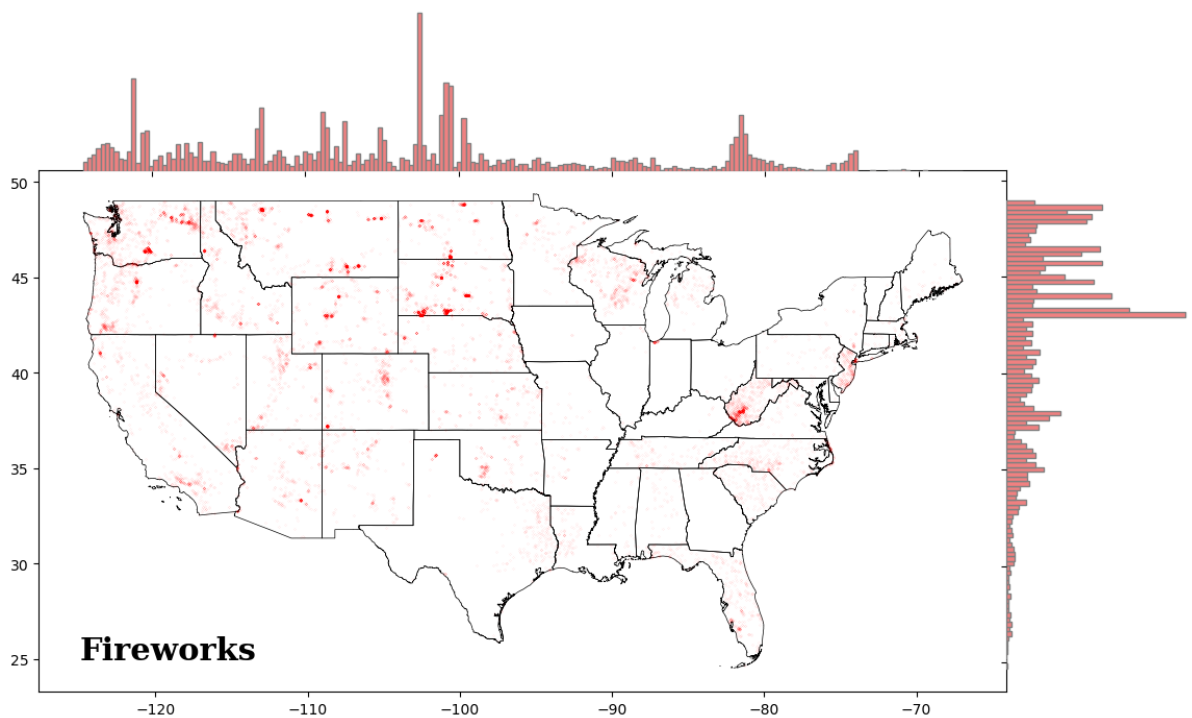

Figure S10. Spatial distribution of fire ignitions caused by fireworks in the contiguous United States from 1992-2020.

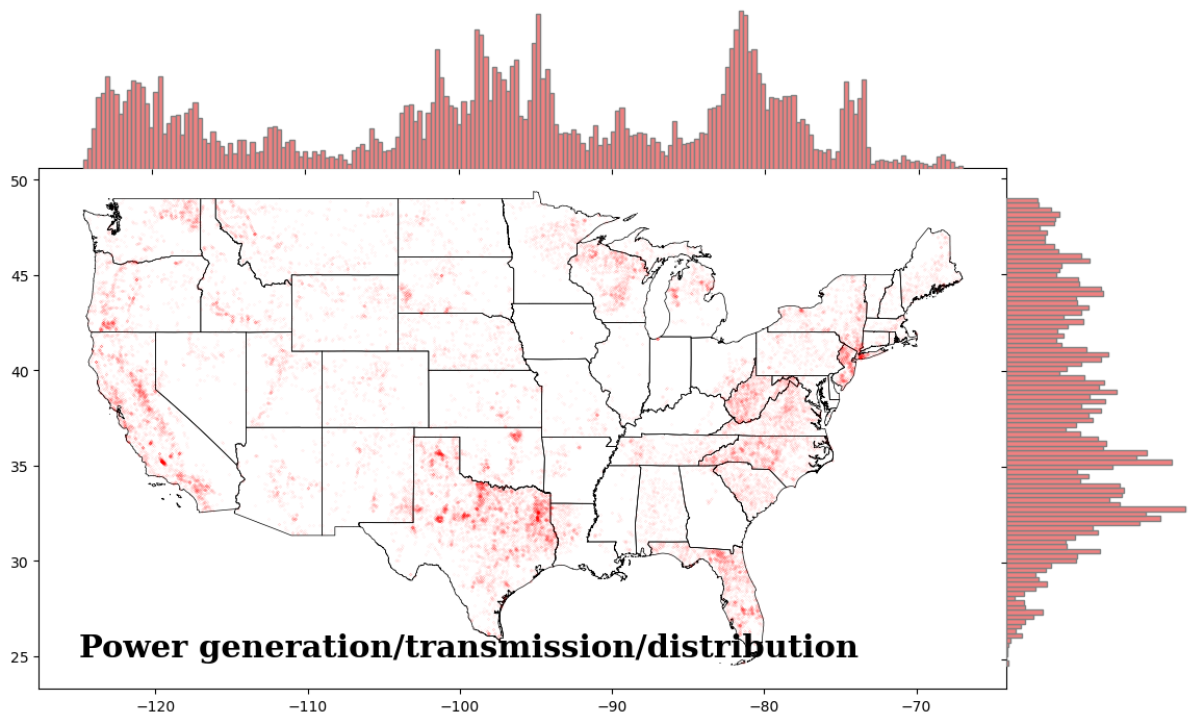

Figure S11. Spatial distribution of fire ignitions caused by power generation, transmission, or distribution in the contiguous United States from 1992-2020.

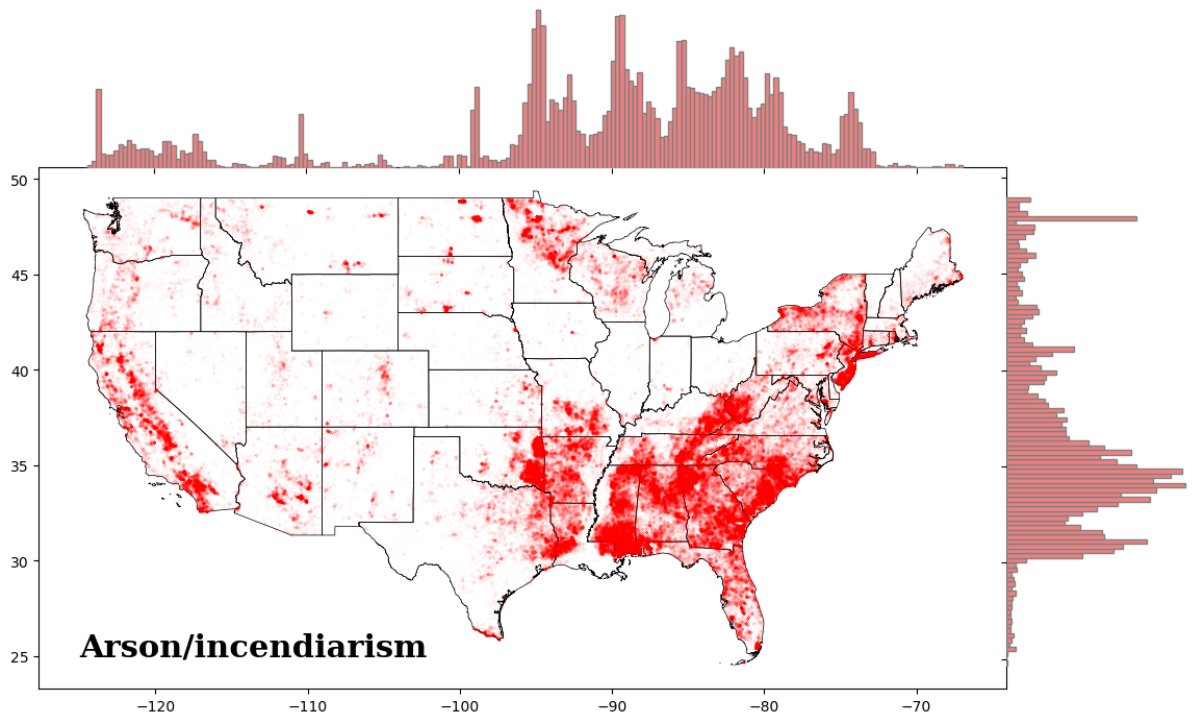

Figure S12. Spatial distribution of fire ignitions caused by arson or incendiary in the contiguous United States from 1992-2020.

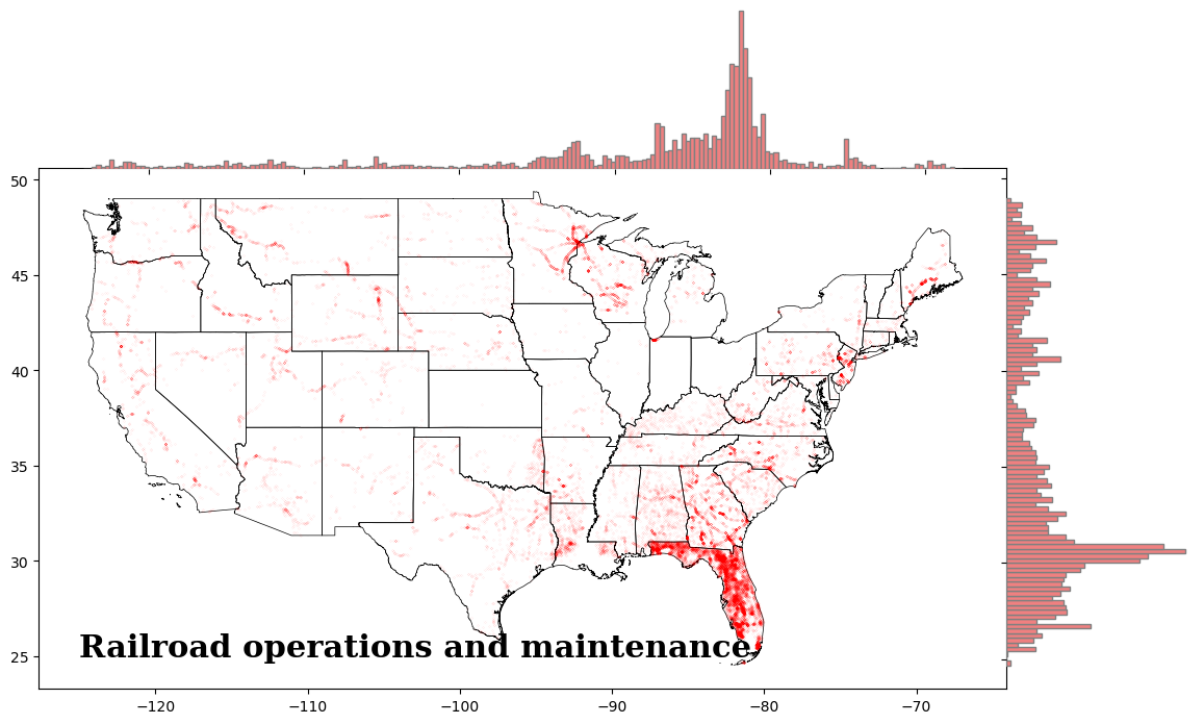

Figure S13. Spatial distribution of fire ignitions caused by railroad operations and maintenance in the contiguous United States from 1992-2020.

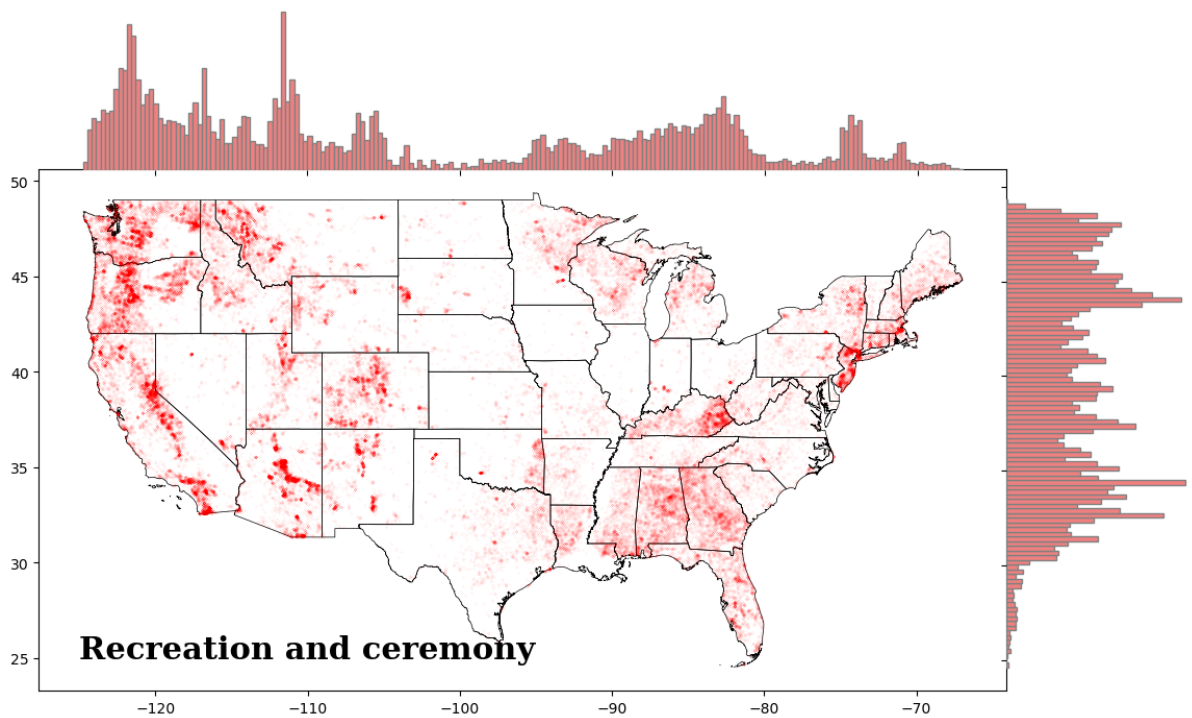

Figure S14. Spatial distribution of fire ignitions caused by recreation and ceremony in the contiguous United States from 1992-2020.



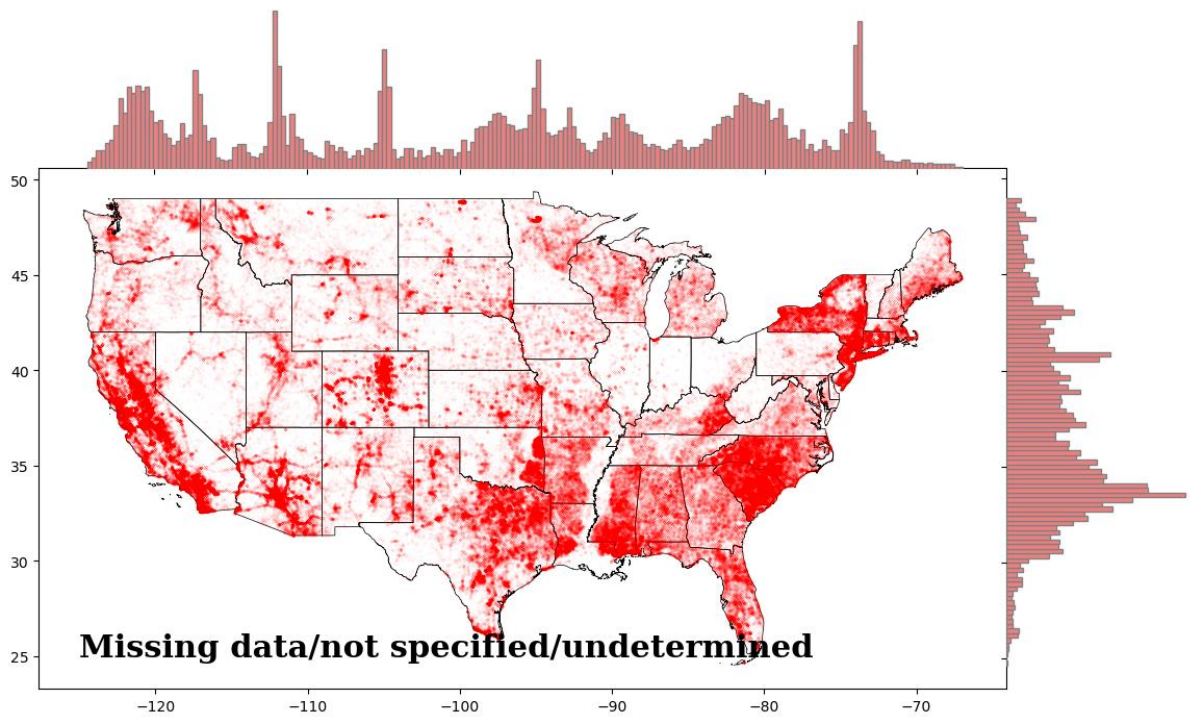

Figure S15. Spatial distribution of fire ignitions for which data are missing or for which a cause was not specified or was undetermined in the contiguous United States from 1992-2020.

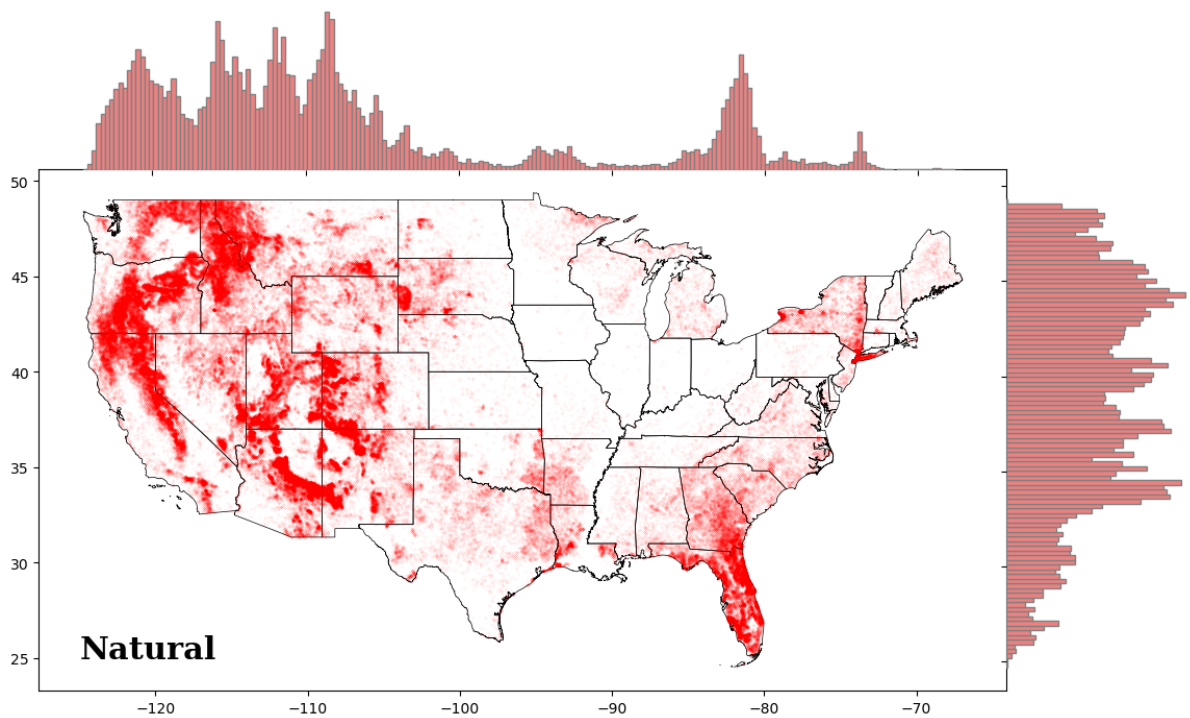

Figure S16. Spatial distribution of natural fire ignitions in the contiguous United States from 1992-2020.

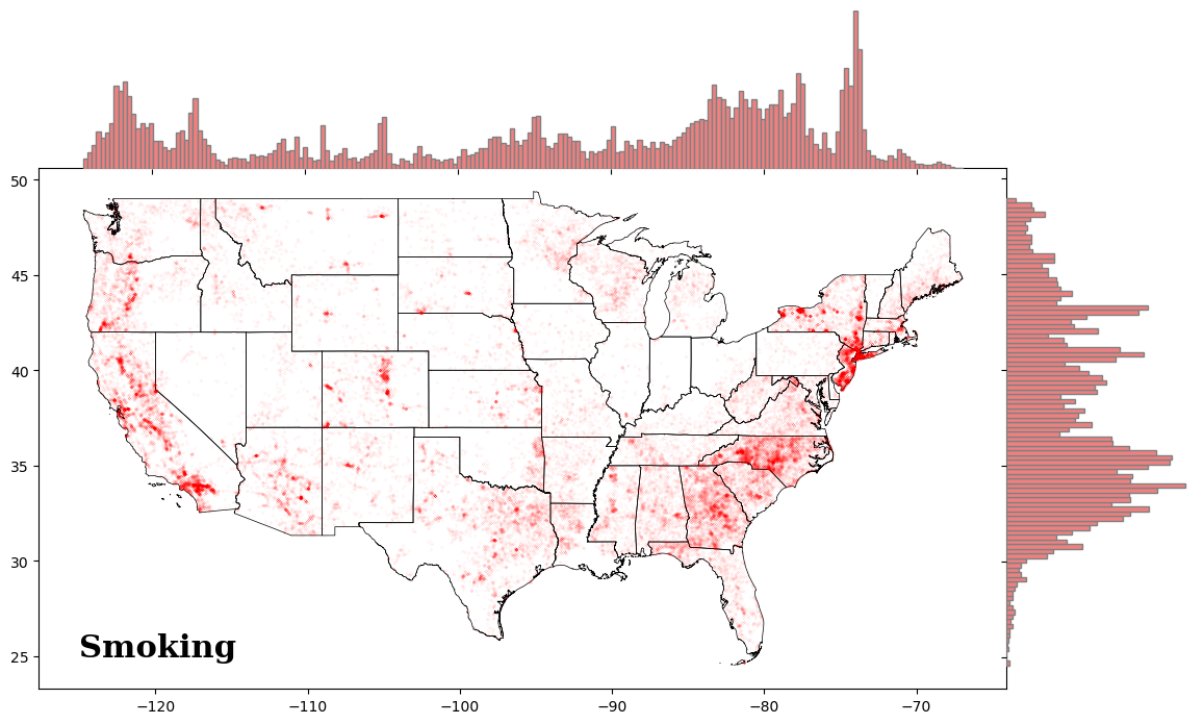

Figure S17. Spatial distribution of fire ignitions caused by smoking in the contiguous United States from 1992-2020.

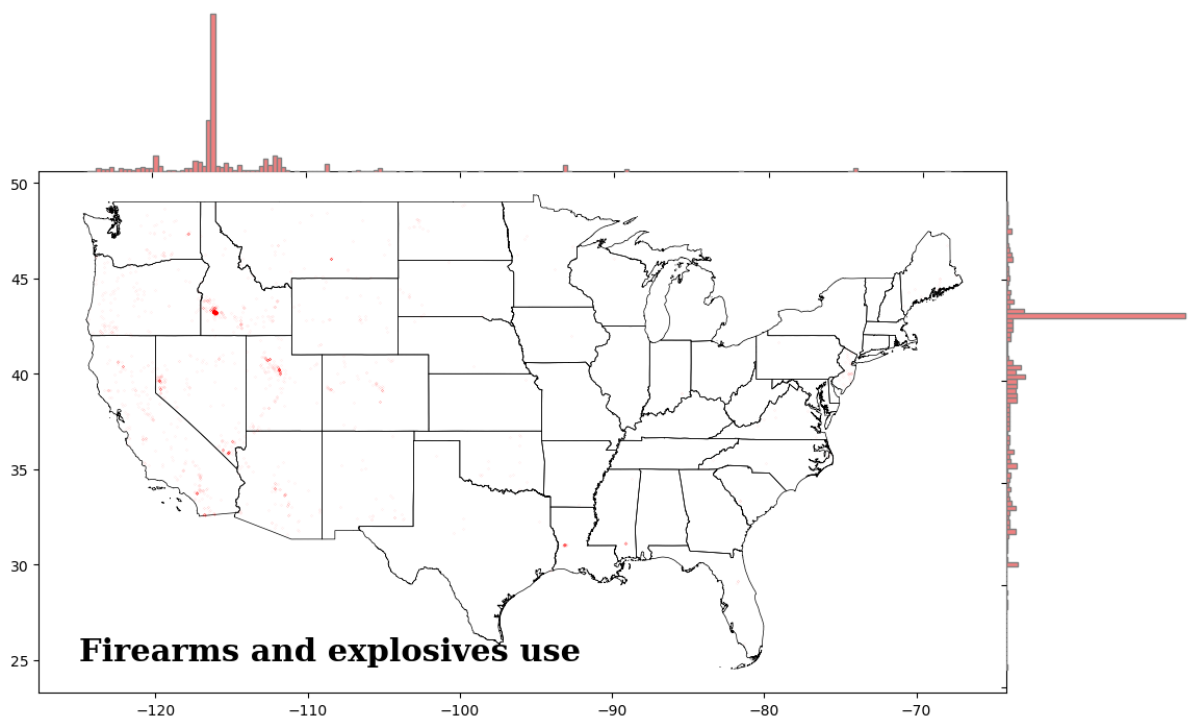

Figure S18. Spatial distribution of fire ignitions caused by firearms and explosives use in the contiguous United States from 1992-2020.

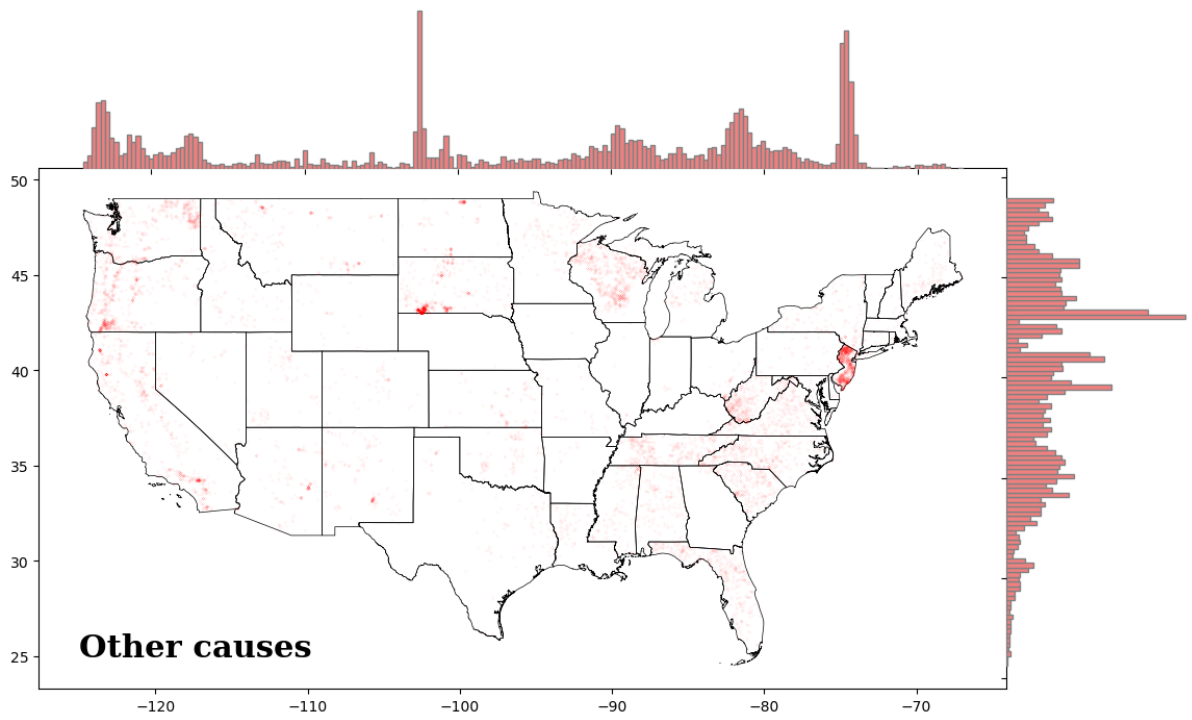

Figure S19. Spatial distribution of fire ignitions with causes not represented in Figures S1-12 in the contiguous United States from 1992-2020.
